# Supplementary material for: Role of the thiosugar ring in the inhibitory activity of salacinol, a potent natural α-glucosidase inhibitor
Source: PubMed Central journal article supplement — RSC Adv. 2024 Feb 2;14(7):4471–81. doi: 10.1039/d3ra08485j (PMC10835759; doi:10.1039/d3ra08485j), 2024-02-02

## SUPPLEMENTARY DATA

### **Role of the thiosugar ring in the inhibitory activity of salacinol, a potent natural $\alpha$ -glucosidase inhibitor**

Katsuki Takashima,<sup>a</sup> Shinya Nakamura,<sup>a</sup> Fumihiro Ishikawa,<sup>a</sup> Maiko Nagayama,<sup>a</sup>  
Shinsuke Marumoto,<sup>c</sup> Weijia Xie,<sup>d</sup> Isao Nakanishi,<sup>a</sup> Osamu Muraoka,<sup>b</sup>  
Toshio Morikawa,<sup>b,\*</sup> and Genzoh Tanabe<sup>a,b,\*</sup>

*<sup>a</sup>Faculty of Pharmacy, <sup>b</sup>Pharmaceutical Research and Technology Institute, and <sup>c</sup>Joint  
Research Center, Kindai University, 3-4-1 Kowakae, Higashi-osaka, Osaka 577-8502,  
Japan*

*<sup>d</sup>State Key Laboratory of Natural Medicines, Department of Medicinal Chemistry, China  
Pharmaceutical University, Nanjing 2100009, P. R. China*

<sup>1</sup>H and <sup>13</sup>C NMR spectroscopic data of synthetic compounds

**<sup>1</sup>H NMR spectrum (600 MHz, CDCl<sub>3</sub>) of 2-(1,3-Dibenzylxyprop-2-ylthio)ethanol tosylate (30)**

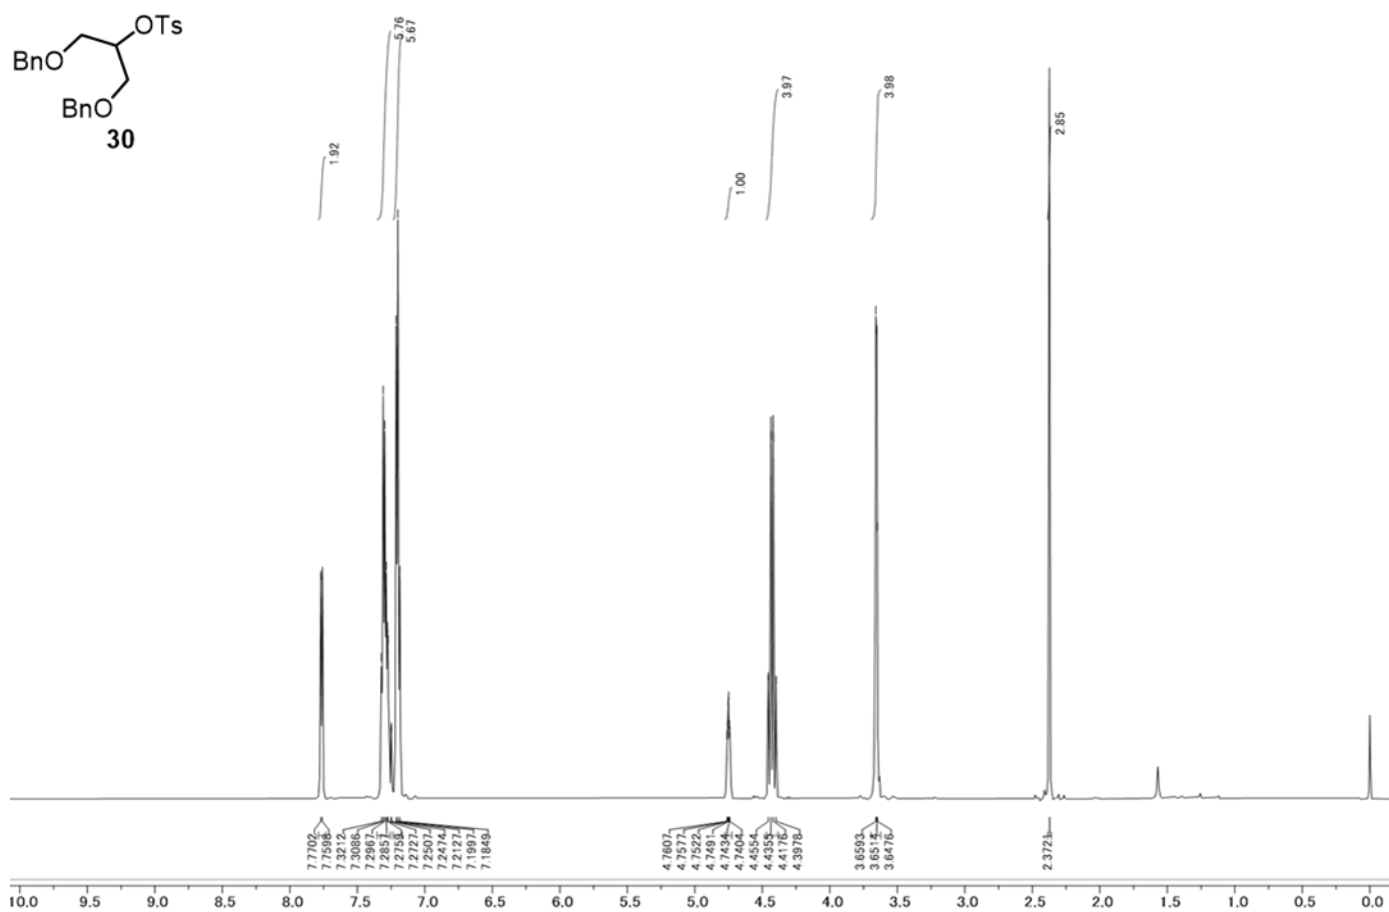

**<sup>13</sup>C NMR spectrum (150 MHz, CDCl<sub>3</sub>) of 2-(1,3-Dibenzylxyprop-2-ylthio)ethanol tosylate (30)**

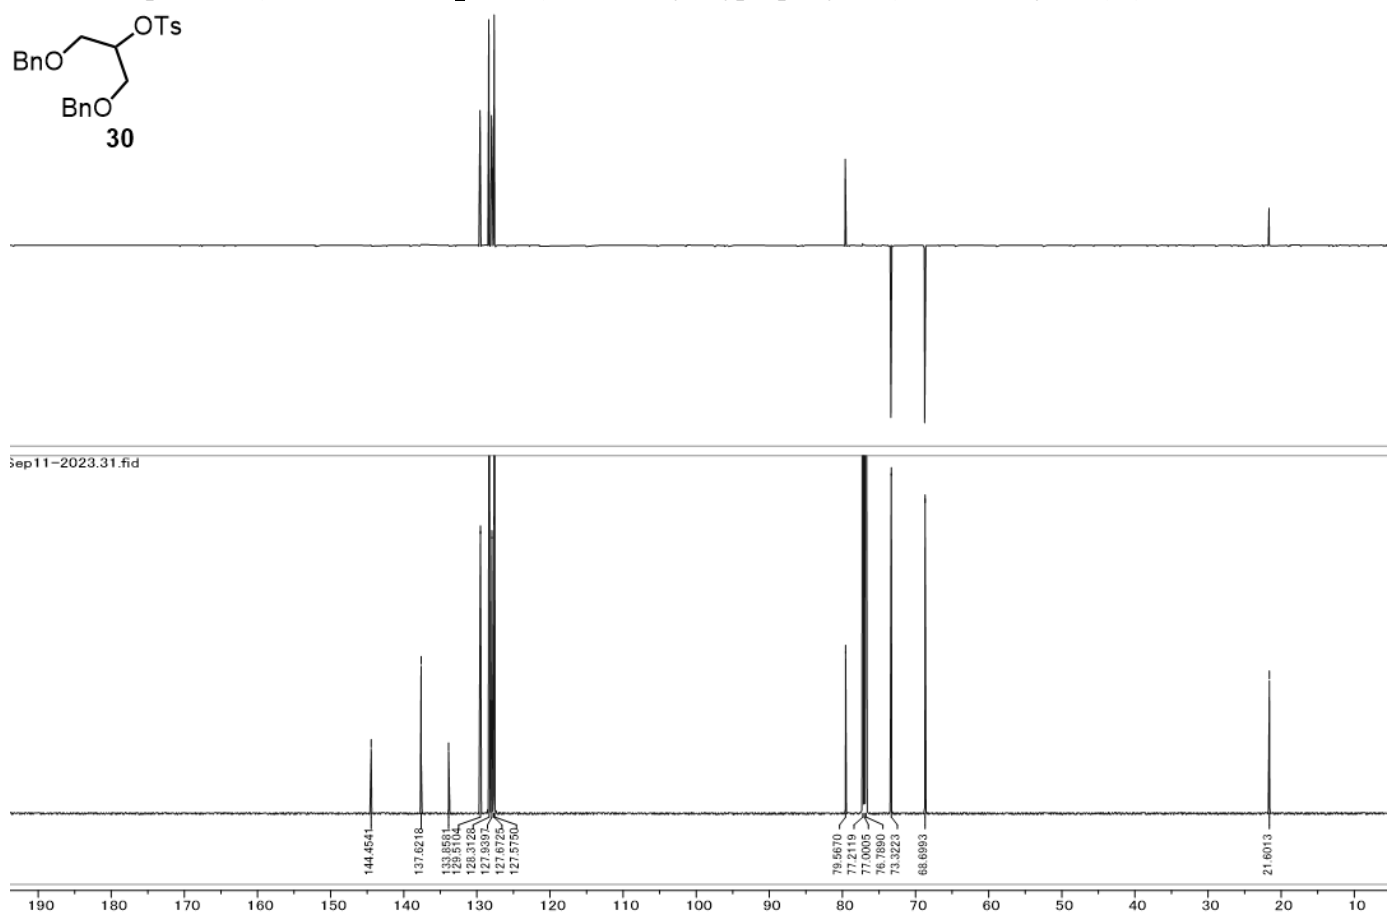

**<sup>1</sup>H NMR spectrum (500 MHz, CDCl<sub>3</sub>) of 2-(1,3-Dibenzyloxyprop-2-ylthio)ethanol (31)**

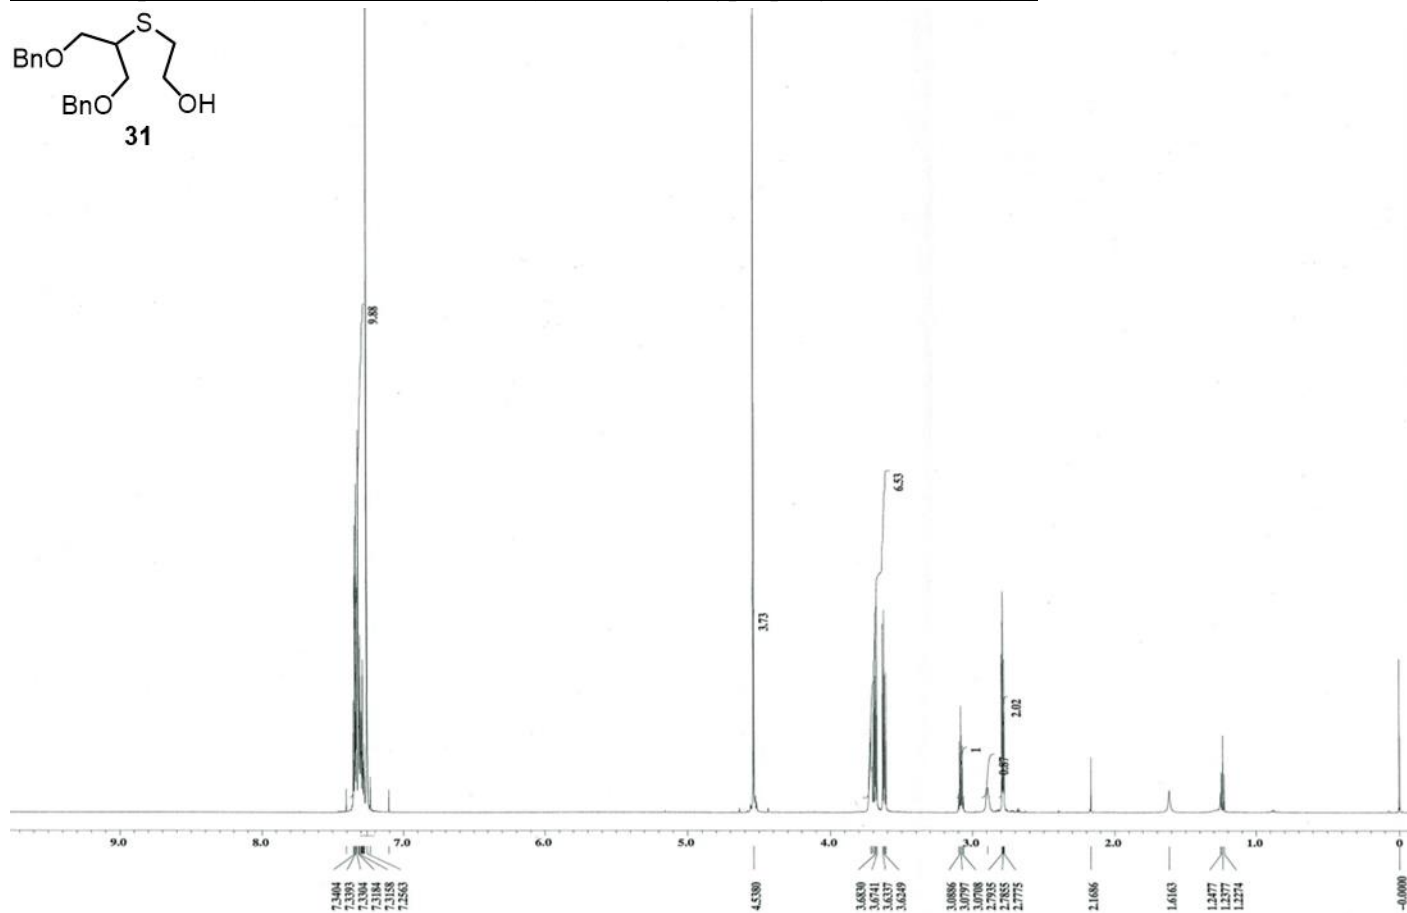

**<sup>13</sup>C NMR spectrum (125 MHz, CDCl<sub>3</sub>) of 2-(1,3-Dibenzyloxyprop-2-ylthio)ethanol (31)**

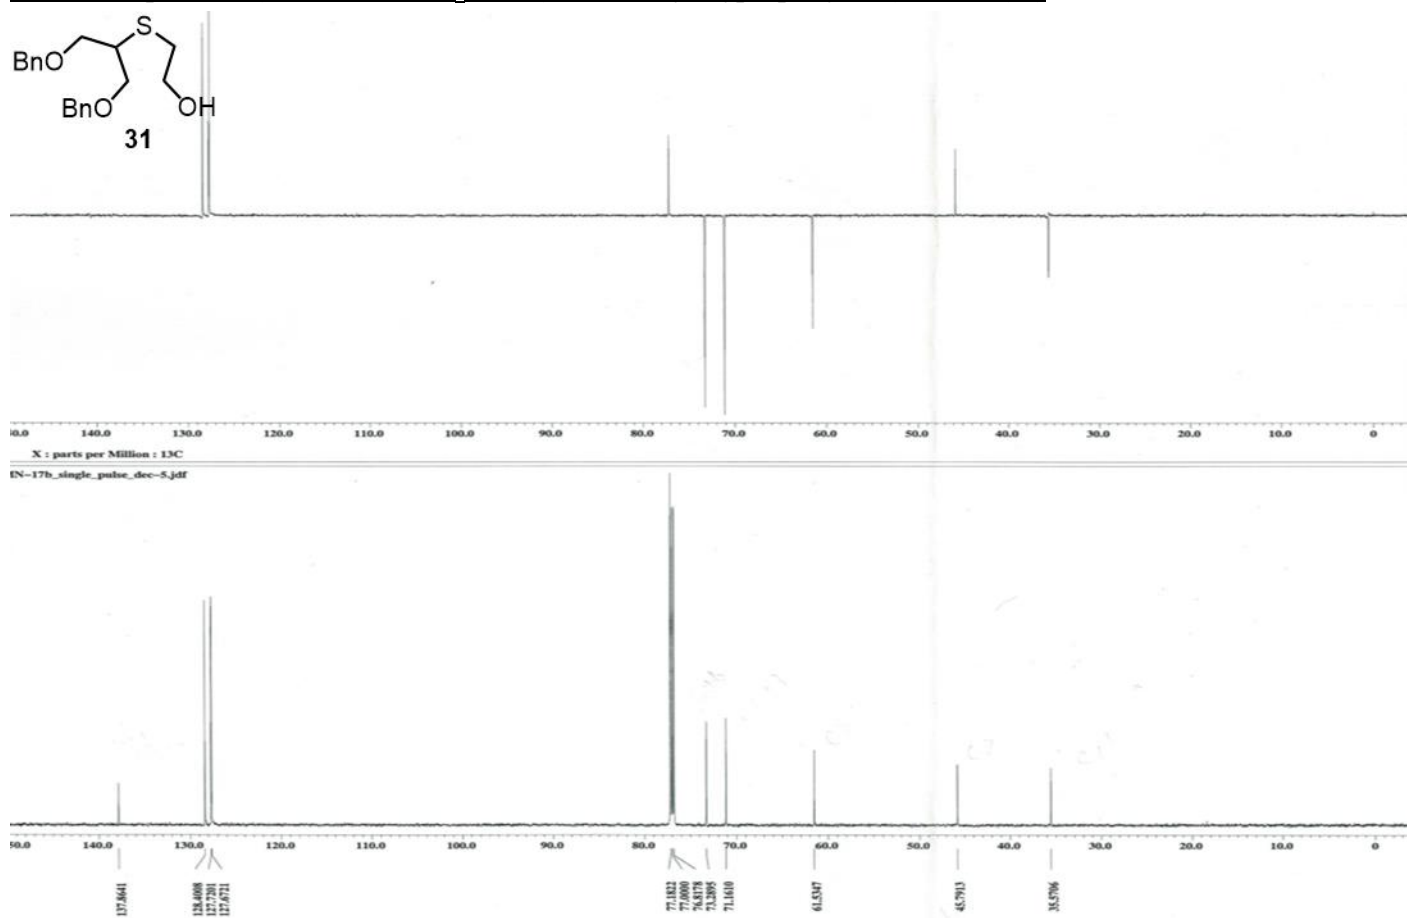

**<sup>1</sup>H NMR spectrum (800 MHz, CDCl<sub>3</sub>) of 2-(Benzyloxyethyl) (1,3-Dibenzyloxyprop-2-yl) Sulfide (32)**

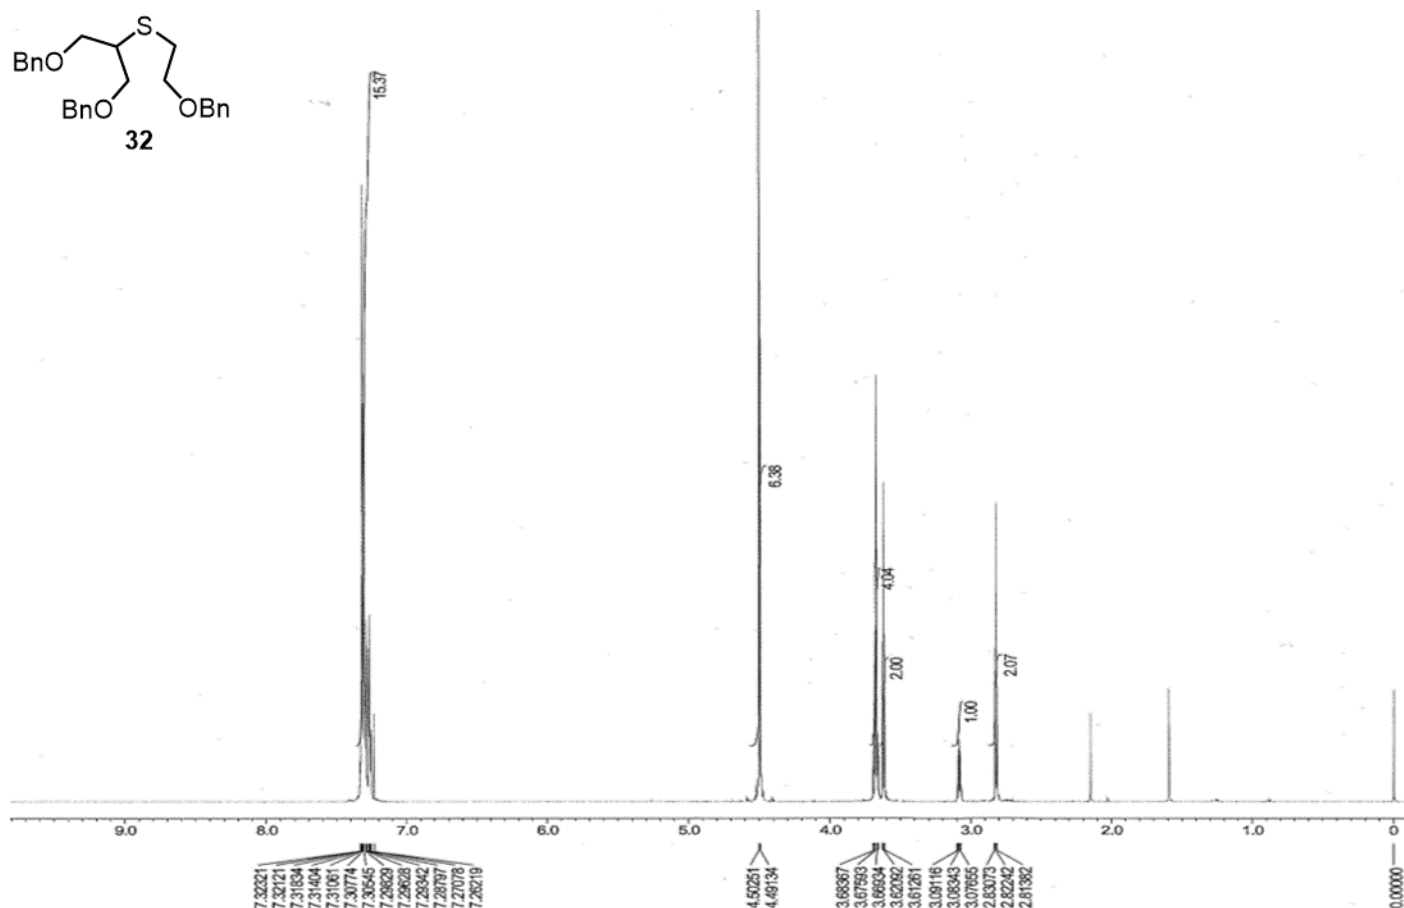

**<sup>13</sup>C NMR spectrum (200 MHz, CDCl<sub>3</sub>) of 2-(Benzyloxyethyl) (1,3-Dibenzyloxyprop-2-yl) Sulfide (32)**

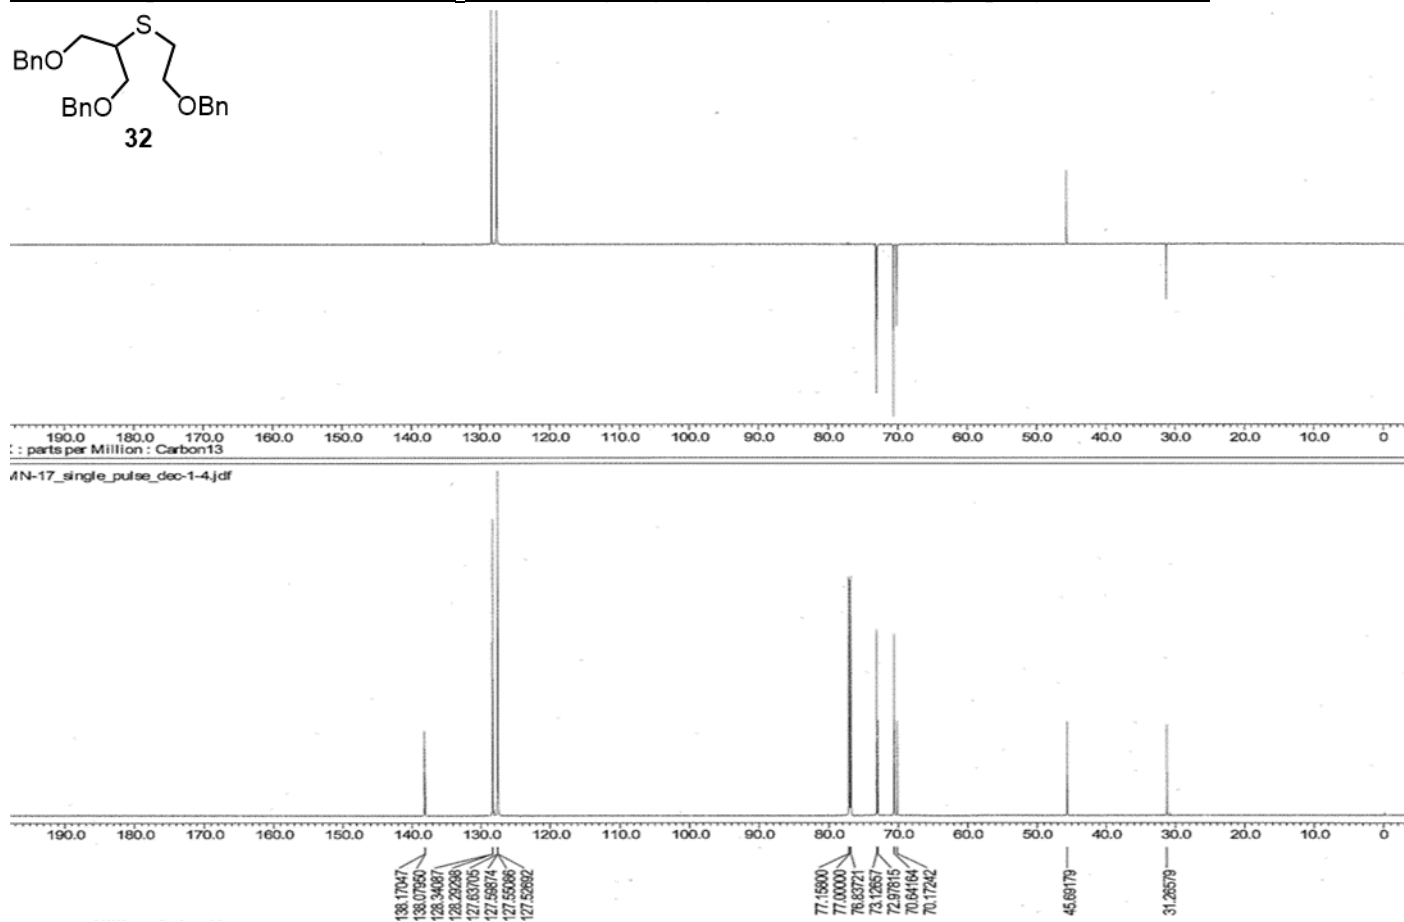

**<sup>1</sup>H NMR spectrum (800 MHz, CDCl<sub>3</sub>) of (2-Benzyloxyethyl) [1,3-Di(benzyloxy)propan-2-yl] [(4*S*,5*S*)-2,2-Dimethyl-5-sulfoxy-1,3-dioxan-4-ylmethyl] Sulfonium Inner Salt (34)**

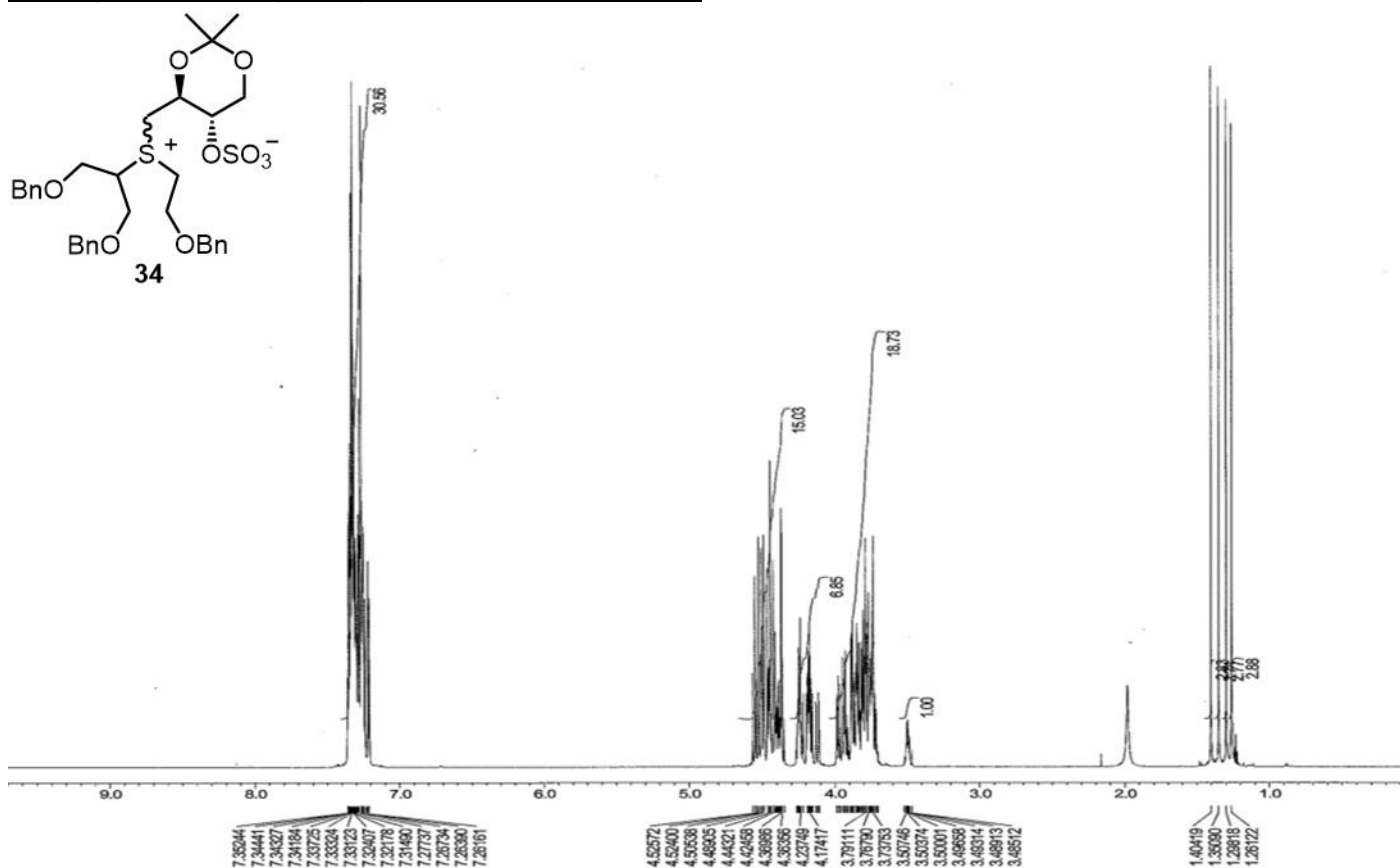

**<sup>13</sup>C NMR spectrum (200 MHz, CDCl<sub>3</sub>) of (2-Benzyloxyethyl) [1,3-Di(benzyloxy)propan-2-yl] [(4*S*,5*S*)-2,2-Dimethyl-5-sulfoxy-1,3-dioxan-4-ylmethyl] Sulfonium Inner Salt (34)**

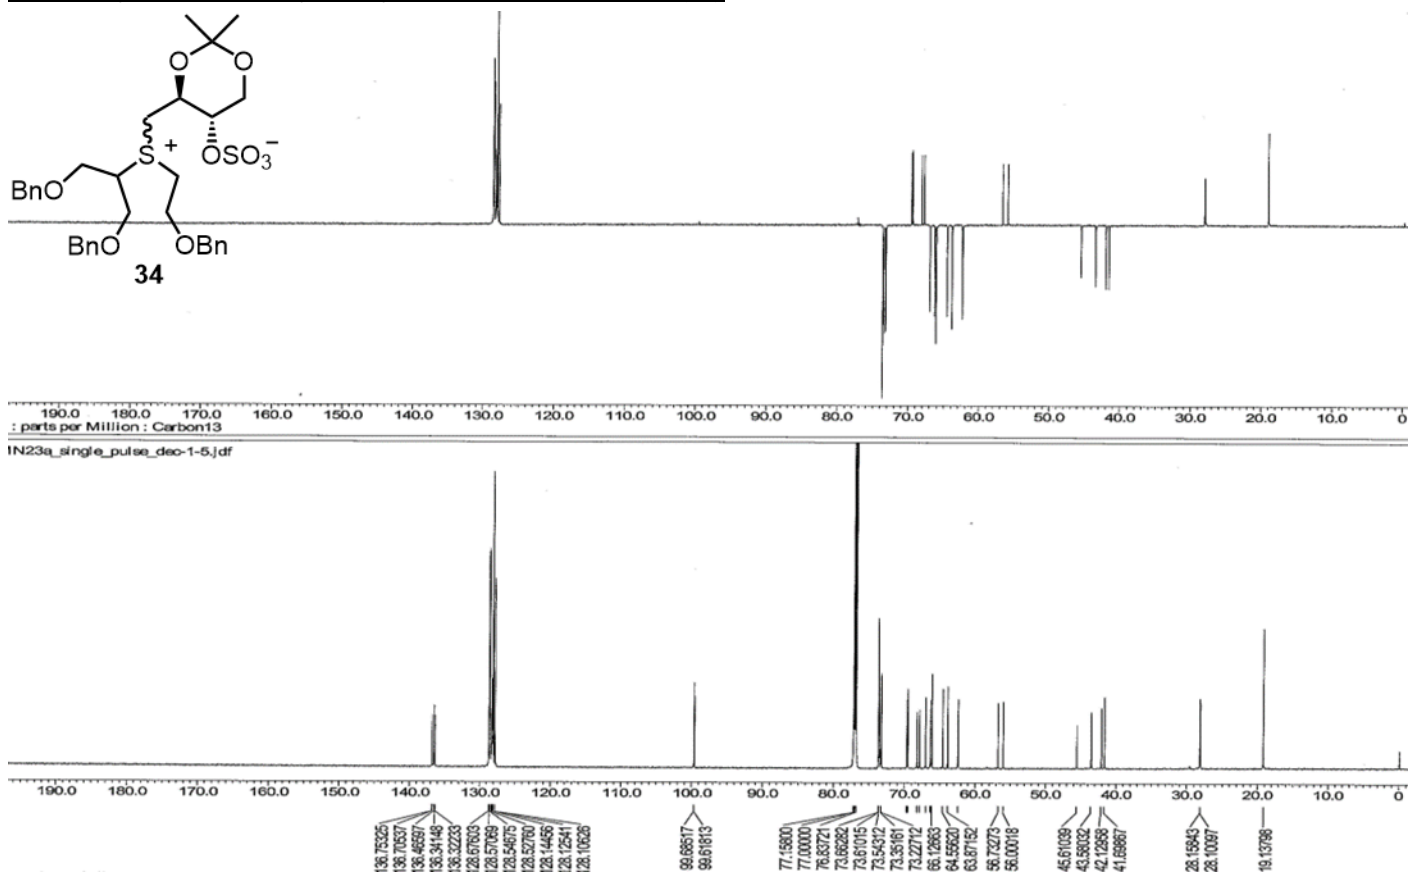

**<sup>1</sup>H NMR spectrum (800 MHz, D<sub>2</sub>O) of (1,3-Dihydroxypropan-2-yl) [(2*S*,3*S*)-2,4-Dihydroxy-3-sulfoo xybutyl] (2-Hydroxyethyl) Sulfonium Inner Salt(26a)**

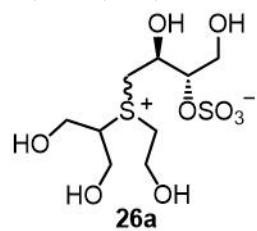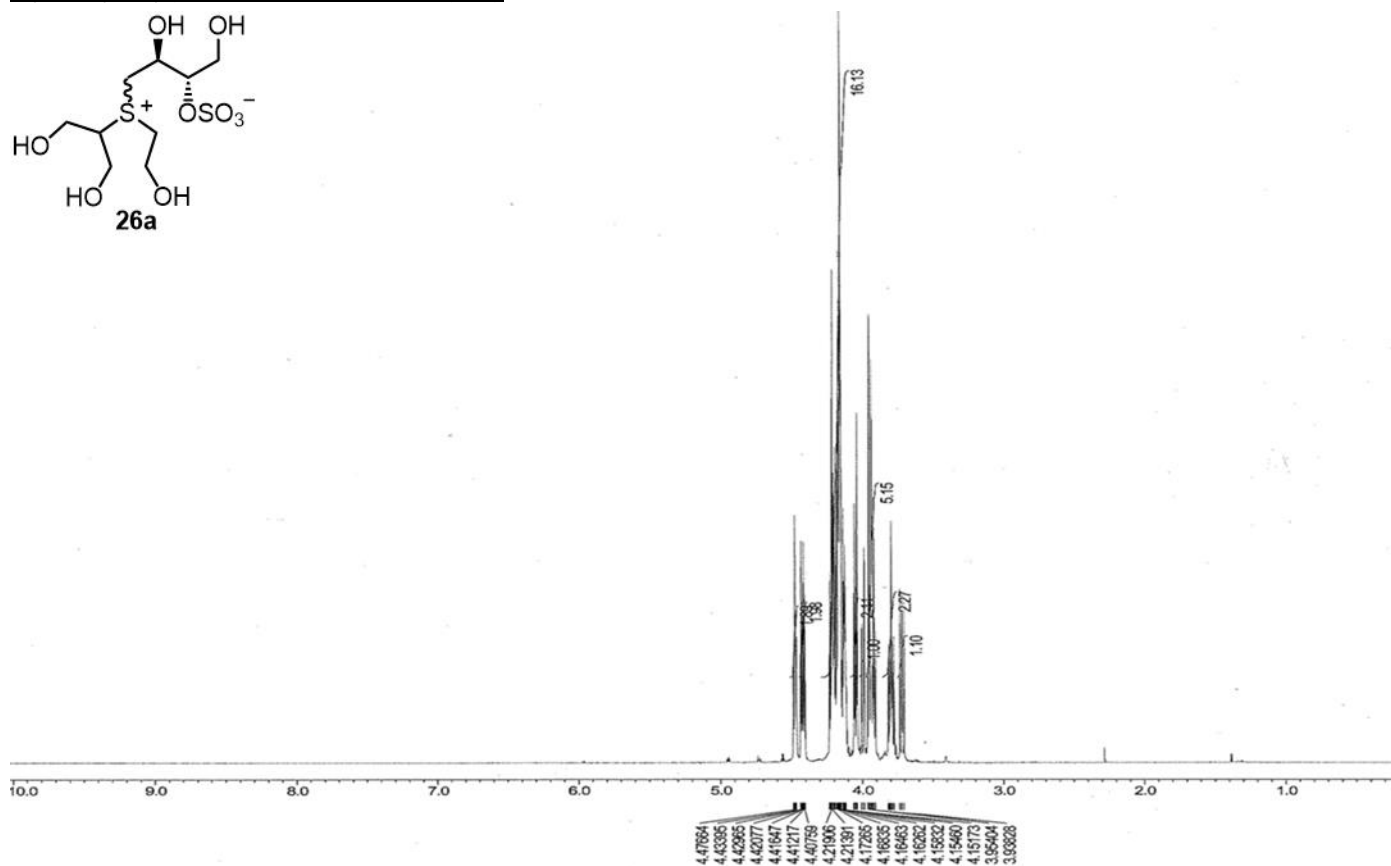

**<sup>13</sup>C NMR spectrum (200 MHz, D<sub>2</sub>O) of (1,3-Dihydroxypropan-2-yl) [(2*S*,3*S*)-2,4-Dihydroxy-3-sulfoo xybutyl] (2-Hydroxyethyl) Sulfonium Inner Salt(26a)**

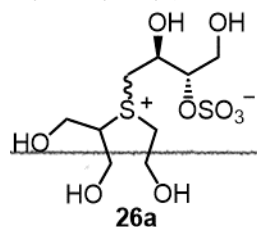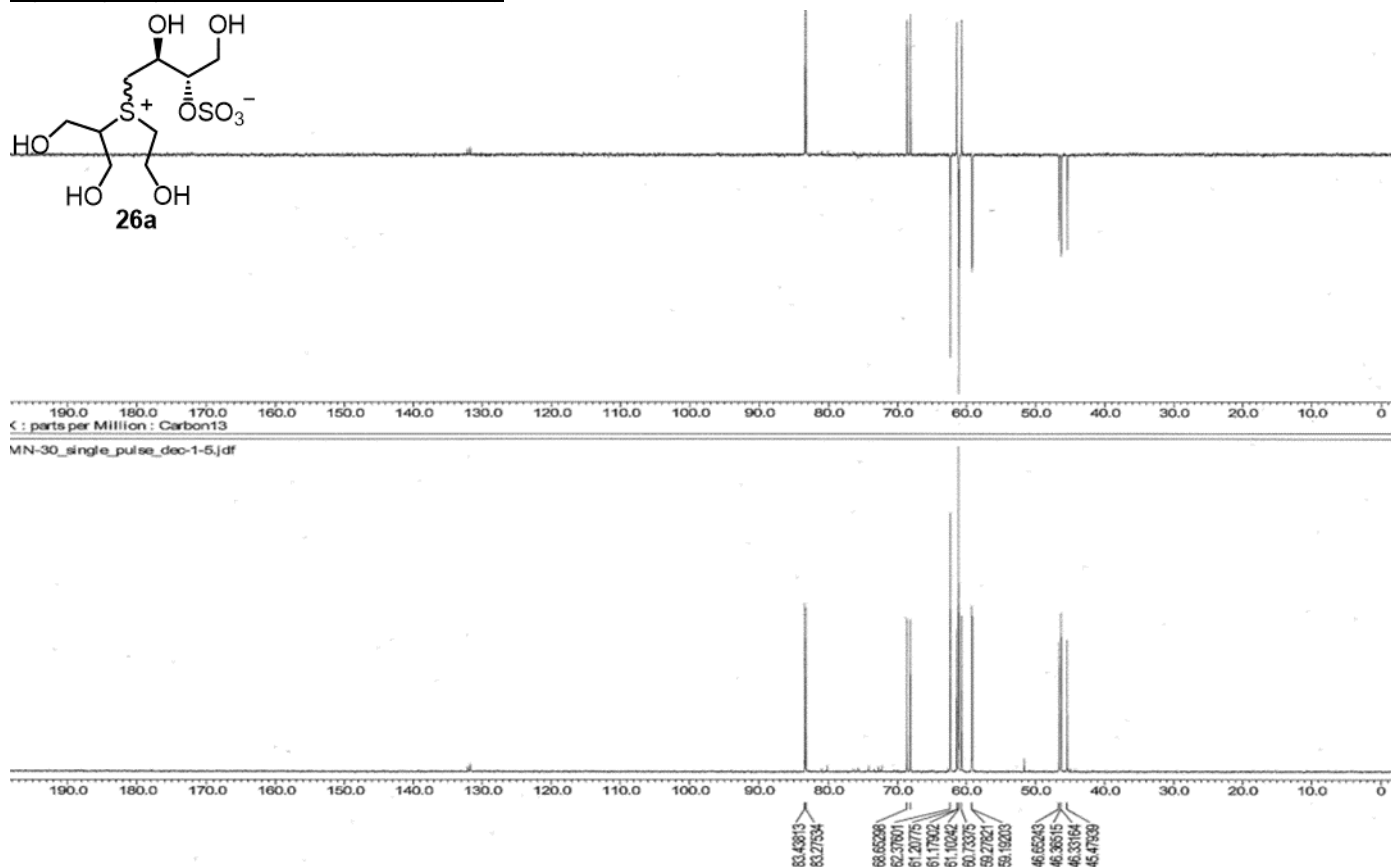

**<sup>1</sup>H NMR spectrum (800 MHz, CD<sub>3</sub>OD) of (1,3-Dihydroxypropan-2-yl) (2-Hydroxyethyl) [(2*S*,3*S*)-2,3,4-Trihydroxybutyl] Sulfonium Methyl Sulfate (26b)**

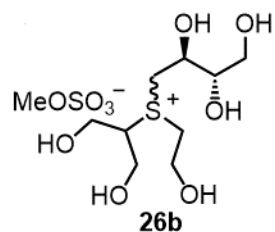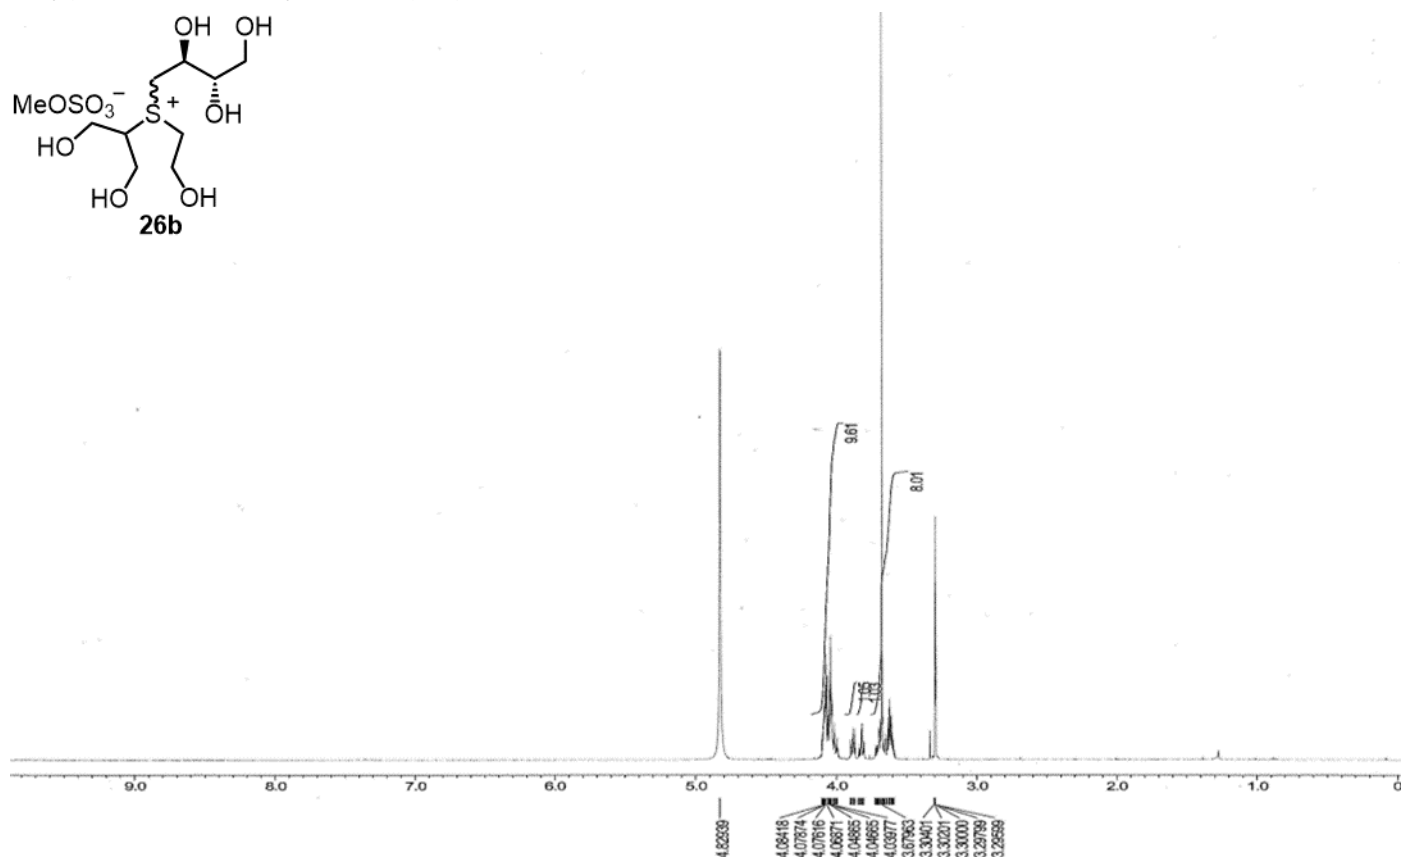

**<sup>13</sup>C NMR spectrum (200 MHz, CD<sub>3</sub>OD) of (1,3-Dihydroxypropan-2-yl) (2-Hydroxyethyl) [(2*S*,3*S*)-2,3,4-Trihydroxybutyl] Sulfonium Methyl Sulfate (26b)**

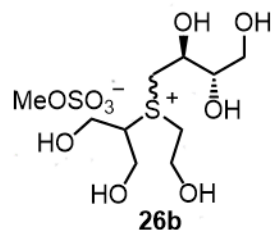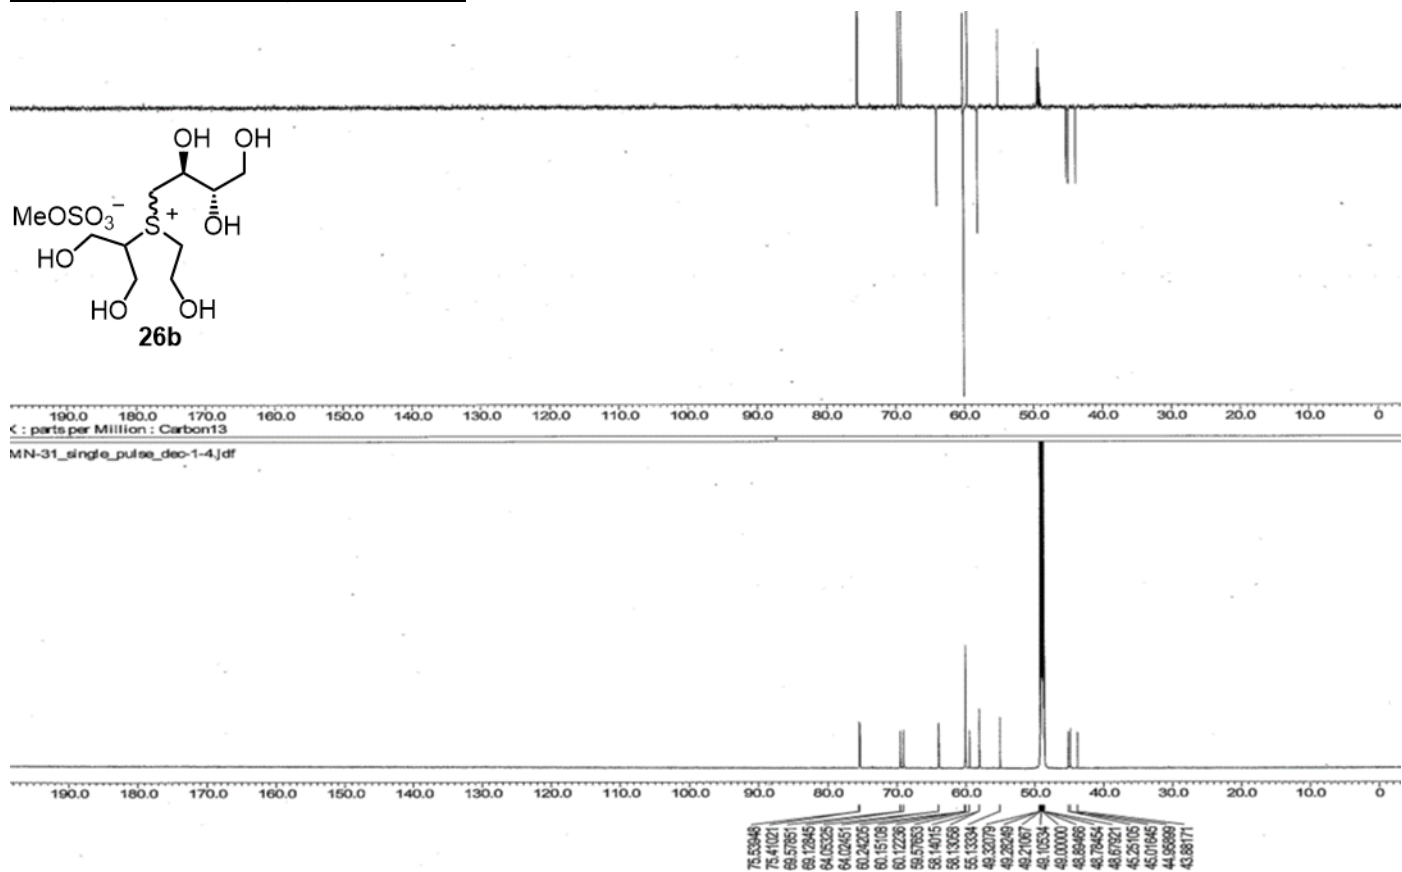

**<sup>1</sup>H NMR spectrum (800 MHz, CD<sub>3</sub>OD) of (1,3-Dihydroxypropan-2-yl) (2-Hydroxyethyl) [(2*S*,3*S*)-2,3,4-trihydroxybutyl] Sulfonium Chloride (26c)**

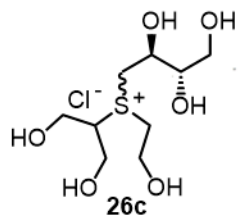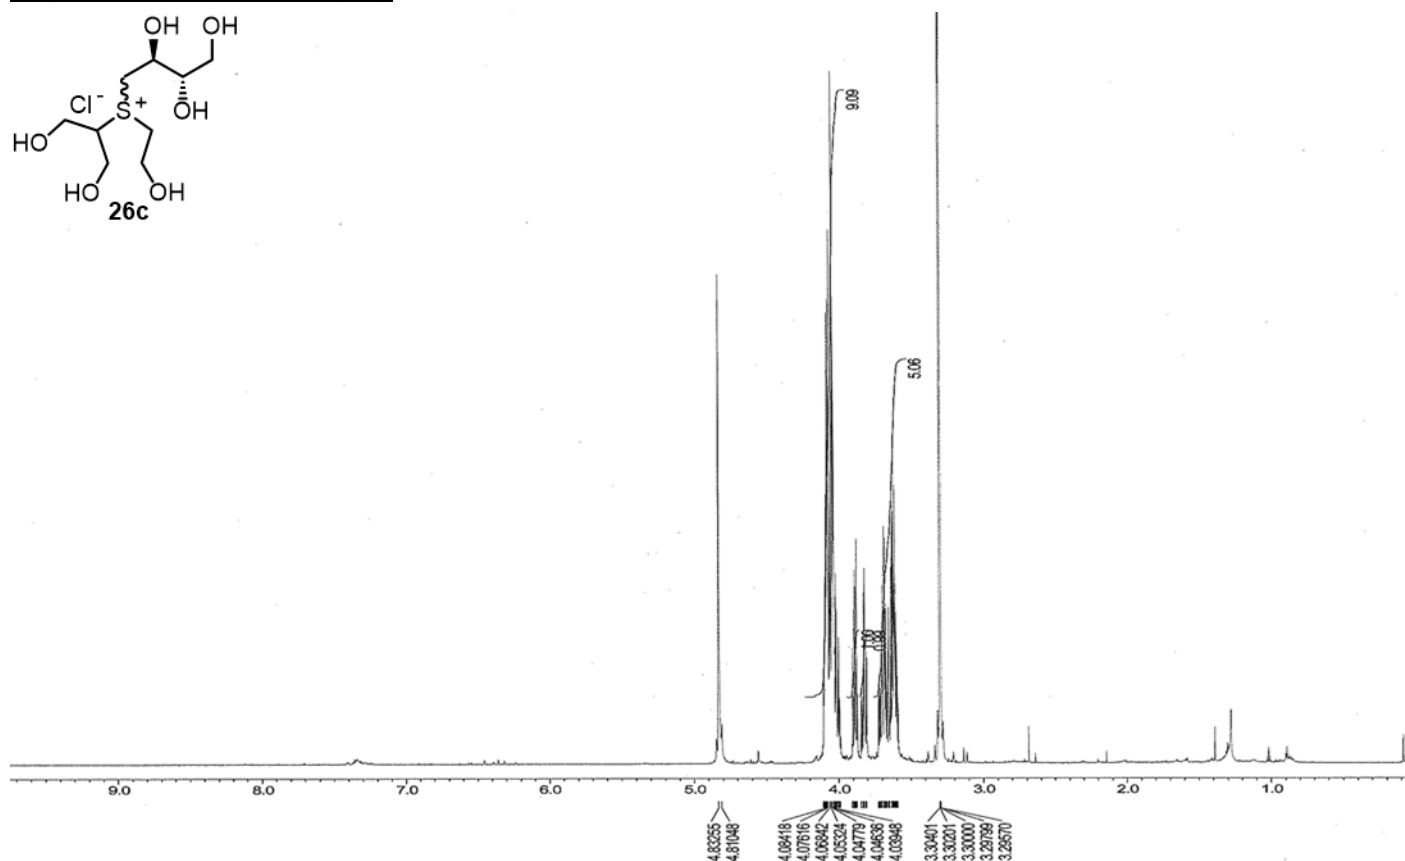

**<sup>13</sup>C NMR spectrum (200 MHz, CD<sub>3</sub>OD) of (1,3-Dihydroxypropan-2-yl) (2-Hydroxyethyl) [(2*S*,3*S*)-2,3,4-trihydroxybutyl] Sulfonium Chloride (26c)**

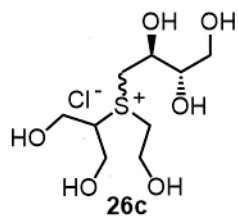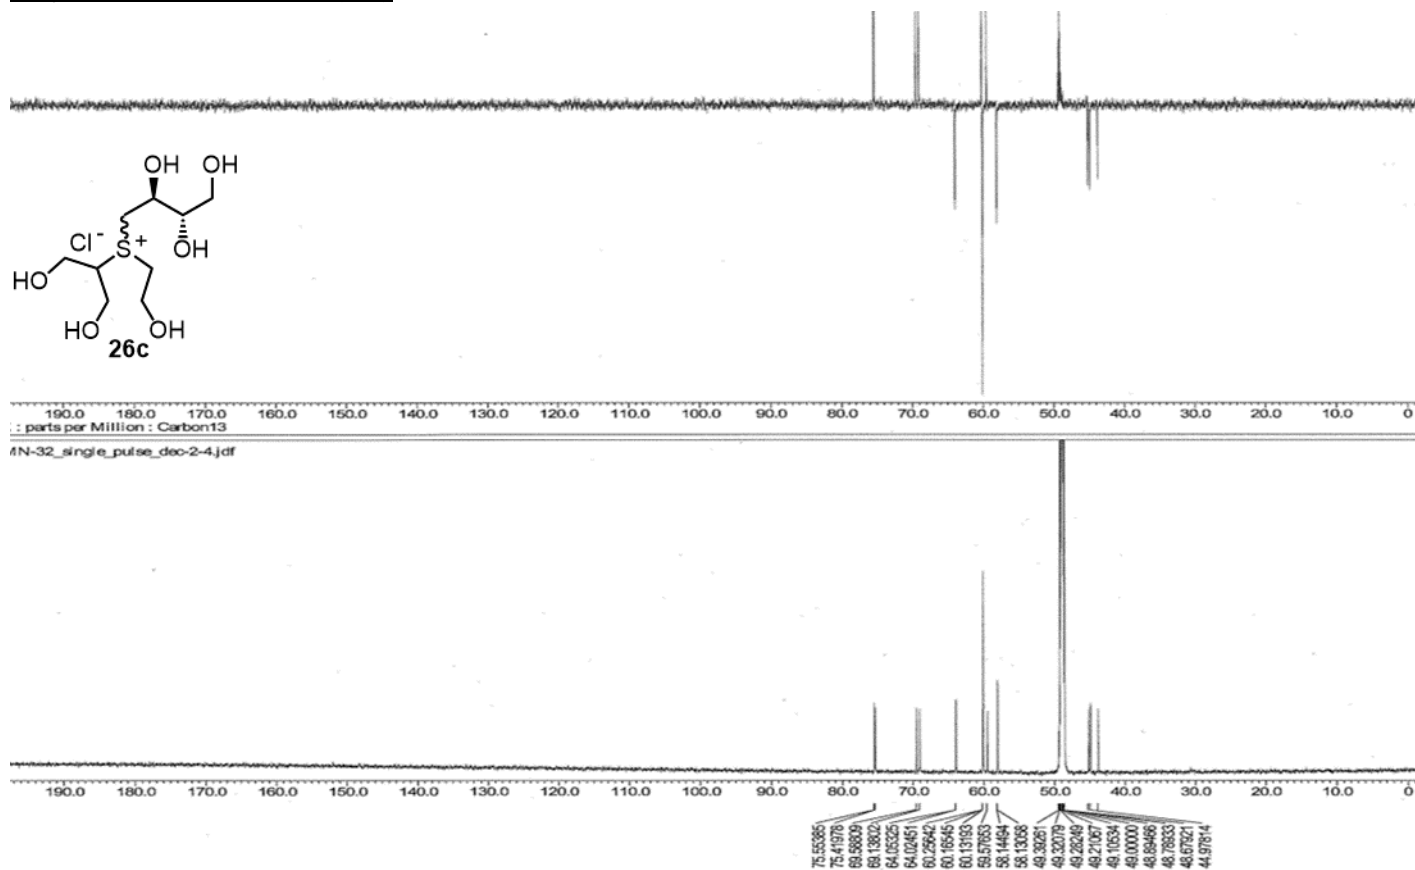



**<sup>1</sup>H NMR spectrum (800 MHz, CDCl<sub>3</sub>) of (2*S*,3*S*)-3,4-Dibenzyloxy-1-[(2-hydroxyethyl)thio]butan-2-ol (36)**

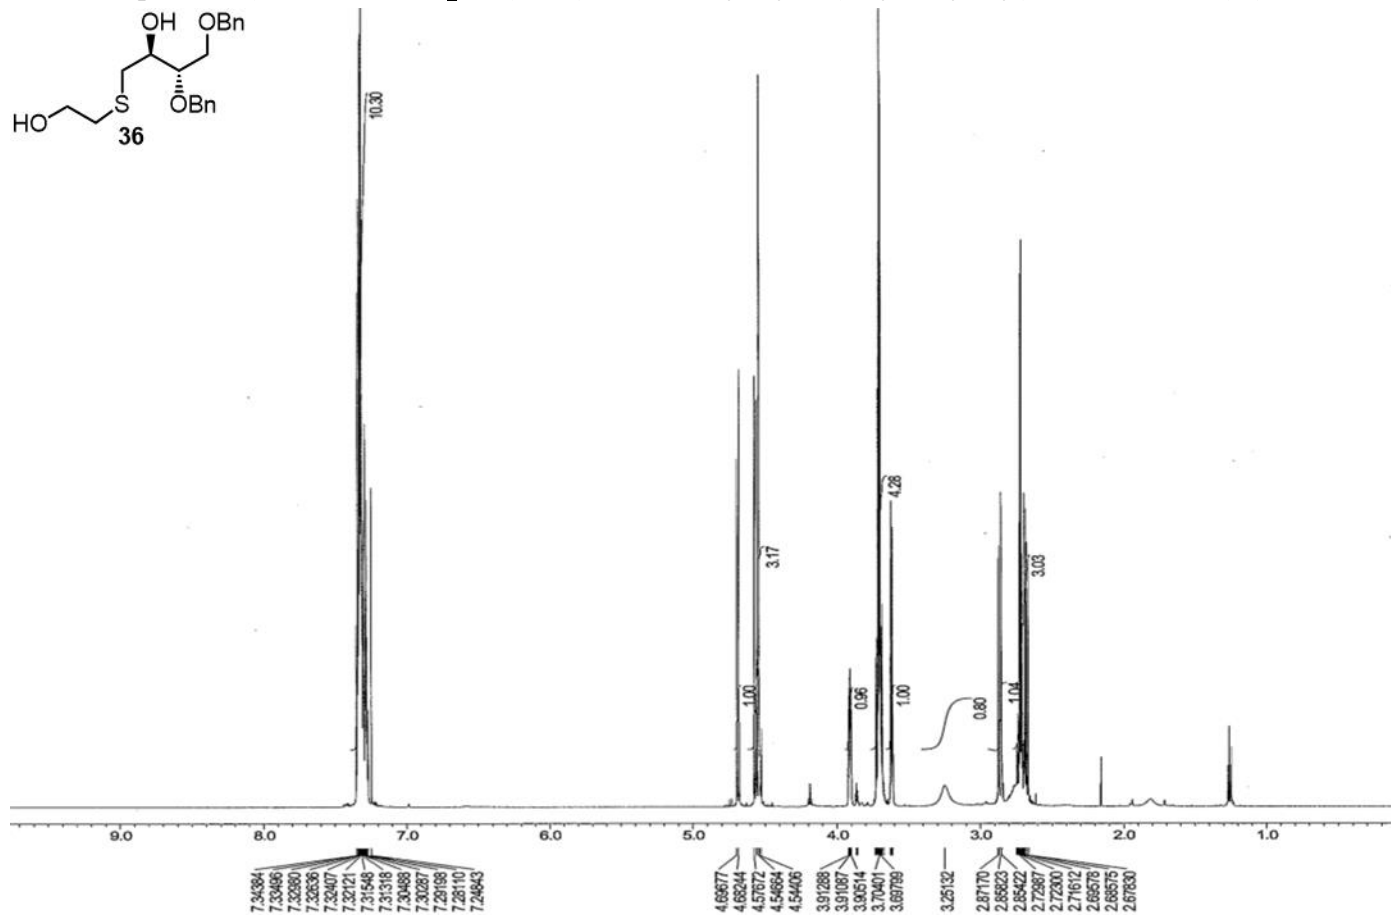

**<sup>13</sup>C NMR spectrum (200 MHz, CDCl<sub>3</sub>) of (2*S*,3*S*)-3,4-Dibenzyloxy-1-[(2-hydroxyethyl)thio]butan-2-ol (36)**

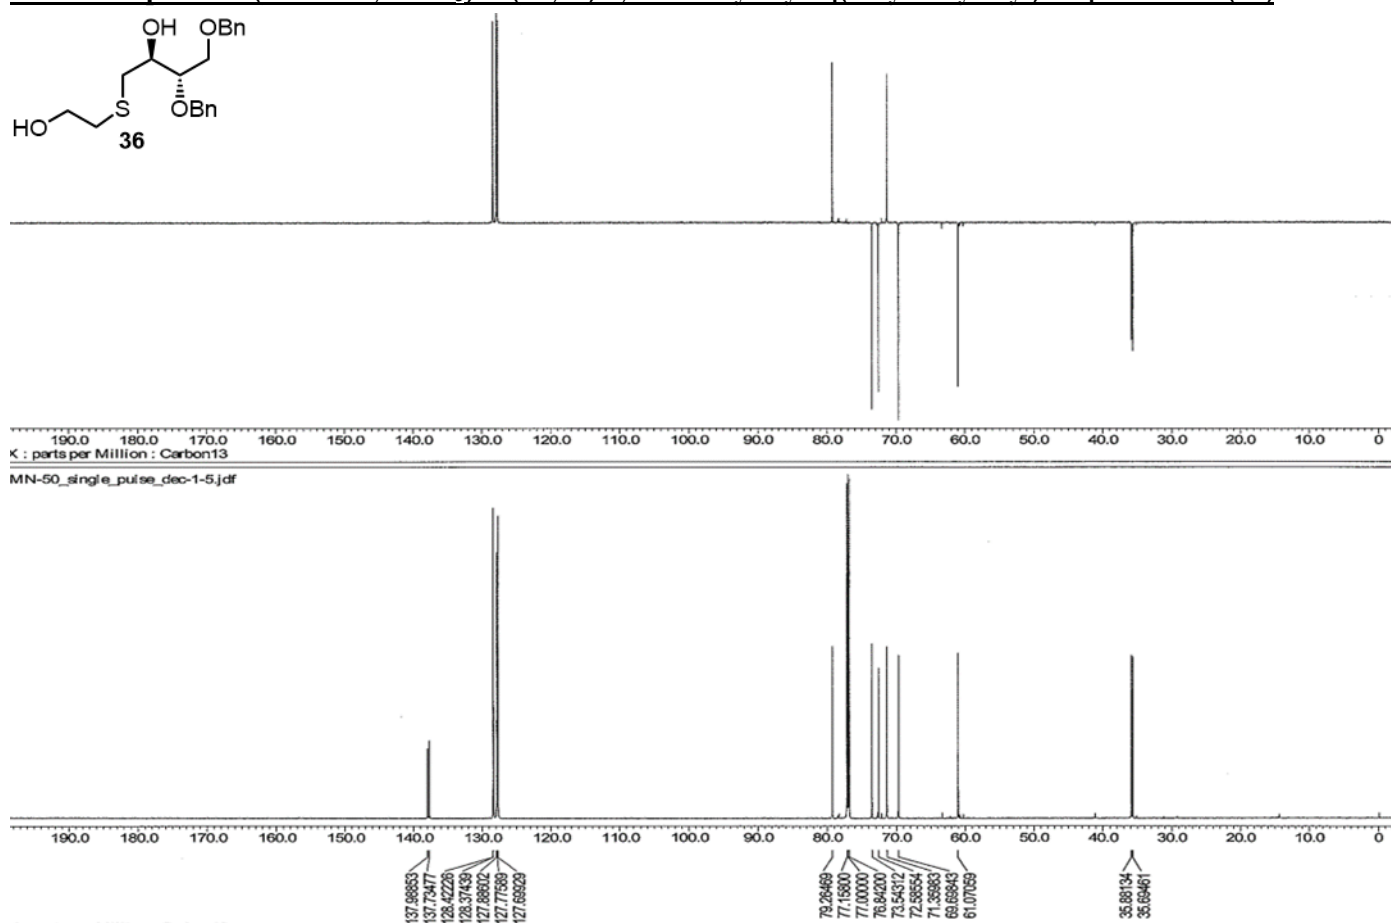

**<sup>1</sup>H NMR spectrum (800 MHz, CD<sub>3</sub>OD) of ((2*S*,3*S*)-3,4-Dibenzoyloxy-2-hydroxybutyl) [(*S*)-2,3-dihydroxy propyl] (2-Hydroxyethyl) Sulfonium Tetrafluoroborate (38)**

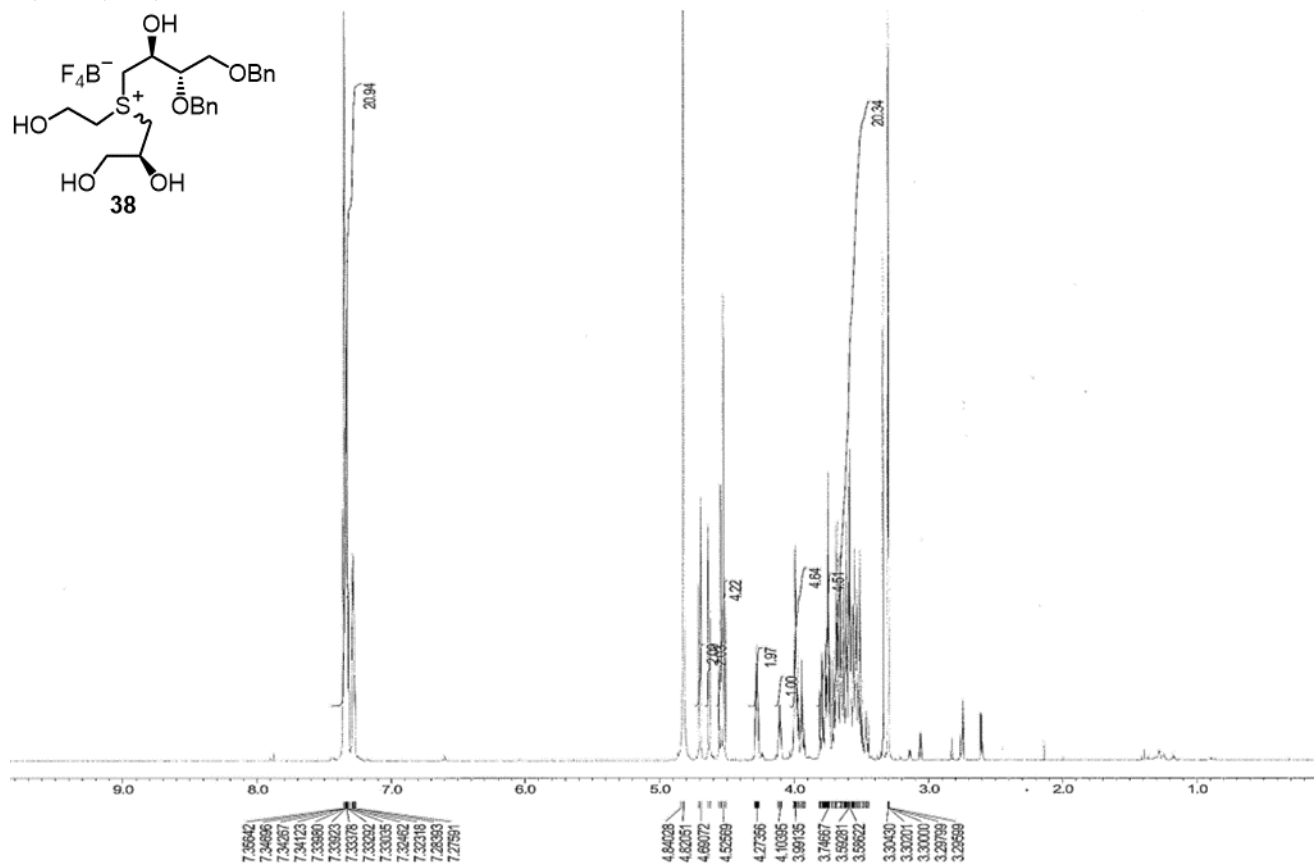

**<sup>13</sup>C NMR spectrum (200 MHz, CD<sub>3</sub>OD) of ((2*S*,3*S*)-3,4-Dibenzoyloxy-2-hydroxybutyl) [(*S*)-2,3-dihydroxy propyl] (2-Hydroxyethyl) Sulfonium Tetrafluoroborate (38)**

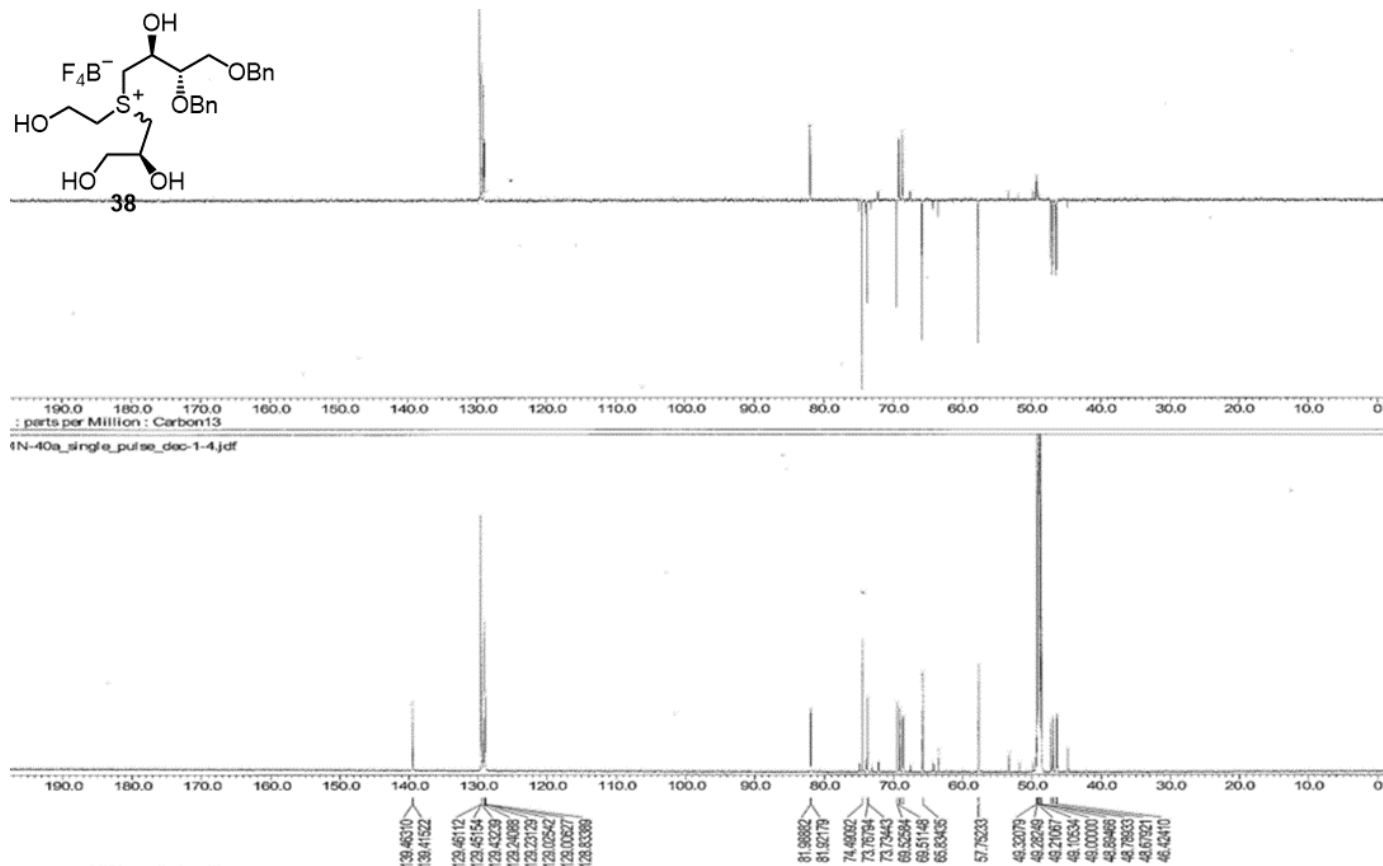

**<sup>1</sup>H NMR spectrum (800 MHz, CD<sub>3</sub>OD) of ((2*S*,3*S*)-3,4-Dibenzoyloxy-2-hydroxybutyl) [(*S*)-2,3-dihydroxy propyl] (2-Hydroxyethyl) Sulfonium Chloride (39)**

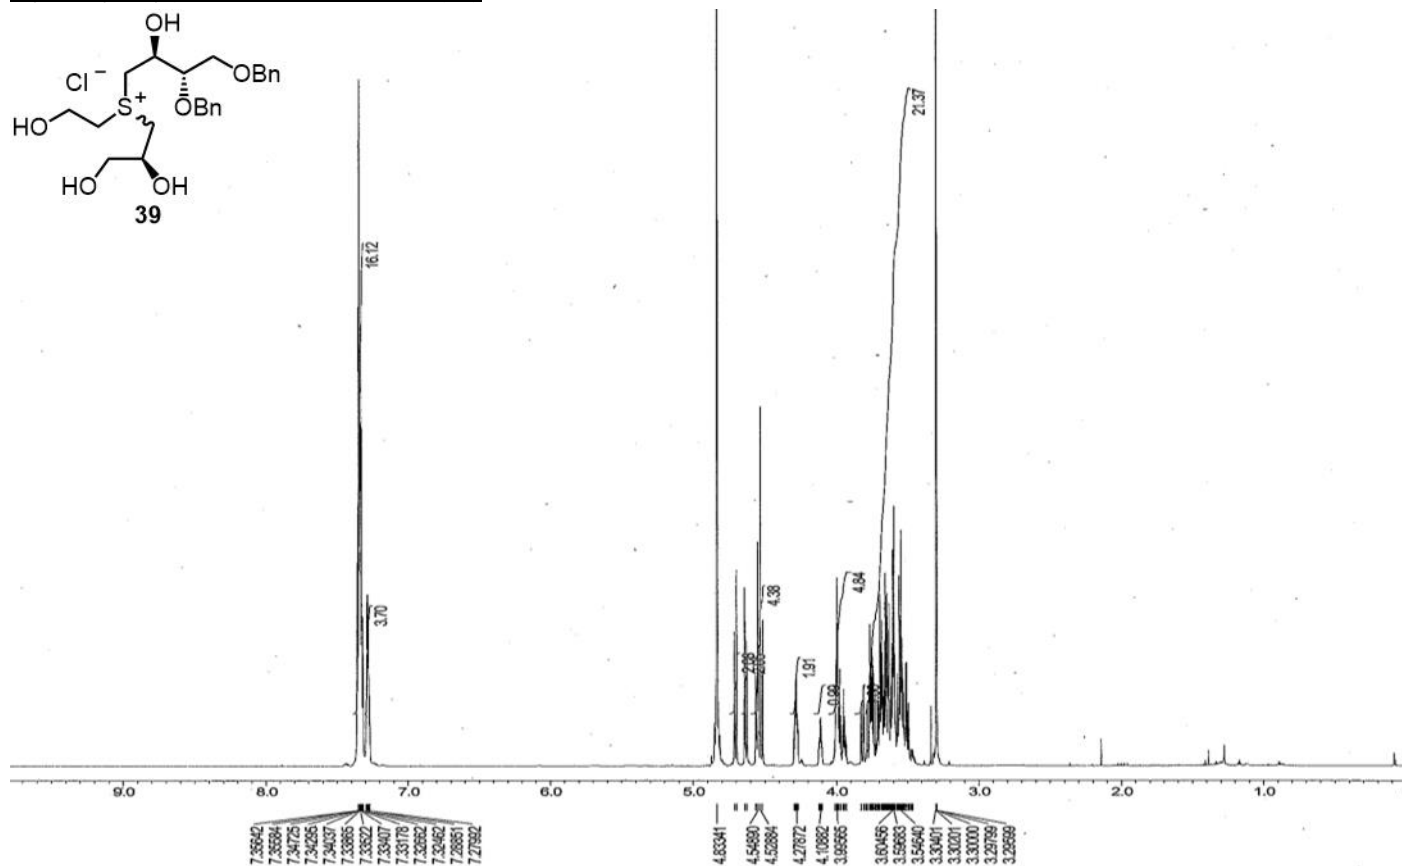

**<sup>13</sup>C NMR spectrum (200 MHz, CD<sub>3</sub>OD) of ((2*S*,3*S*)-3,4-Dibenzoyloxy-2-hydroxybutyl) [(*S*)-2,3-dihydroxy propyl] (2-Hydroxyethyl) Sulfonium Chloride (39)**

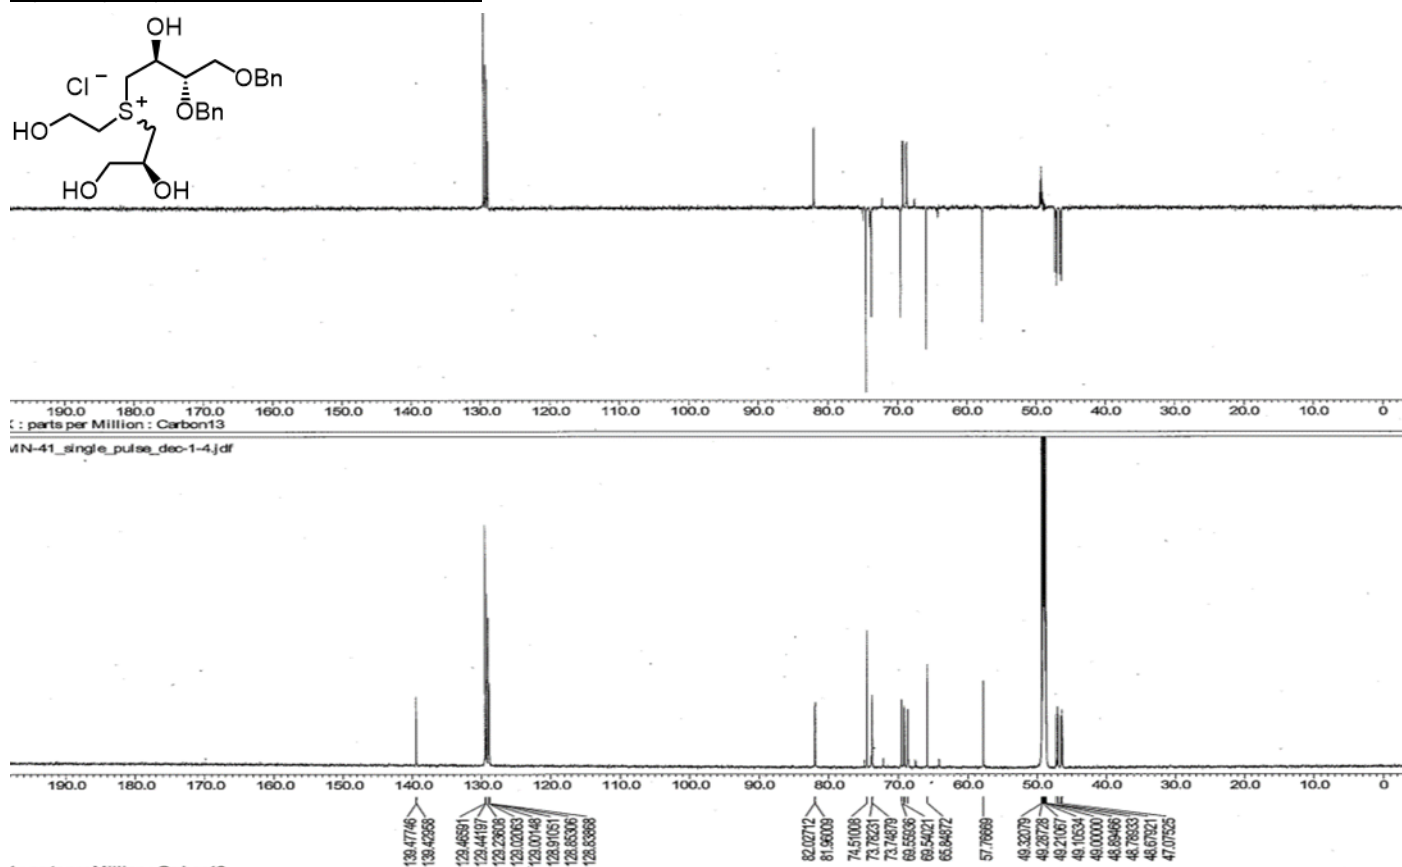

<sup>1</sup>H NMR spectrum (800 MHz, D<sub>2</sub>O) of [(*S*)-2,3-Dihydroxypropyl] (2-Hydroxyethyl) ((*2S,3S*)-2,3,4-trihydroxybutyl) Sulfonium Chloride (27c)

Sulfonium Chloride (27c)

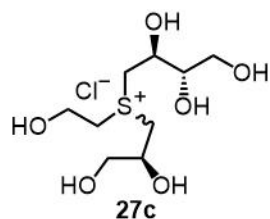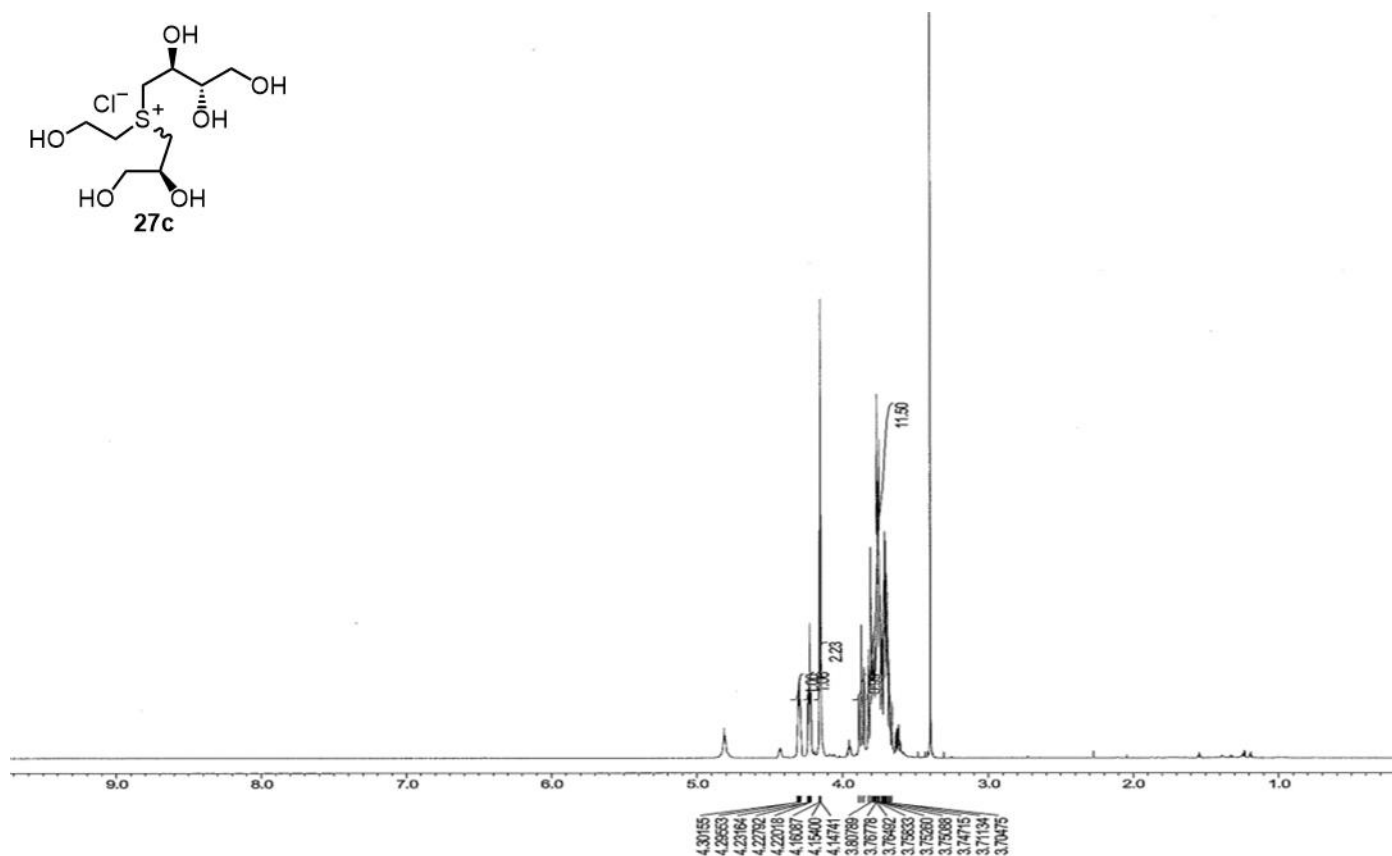

<sup>13</sup>C NMR spectrum (200 MHz, D<sub>2</sub>O) of [(*S*)-2,3-Dihydroxypropyl] (2-Hydroxyethyl) ((*2S,3S*)-2,3,4-trihydroxybutyl) Sulfonium Chloride (27c)

Sulfonium Chloride (27c)

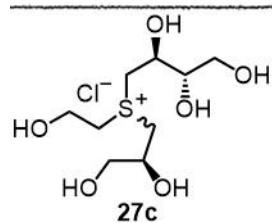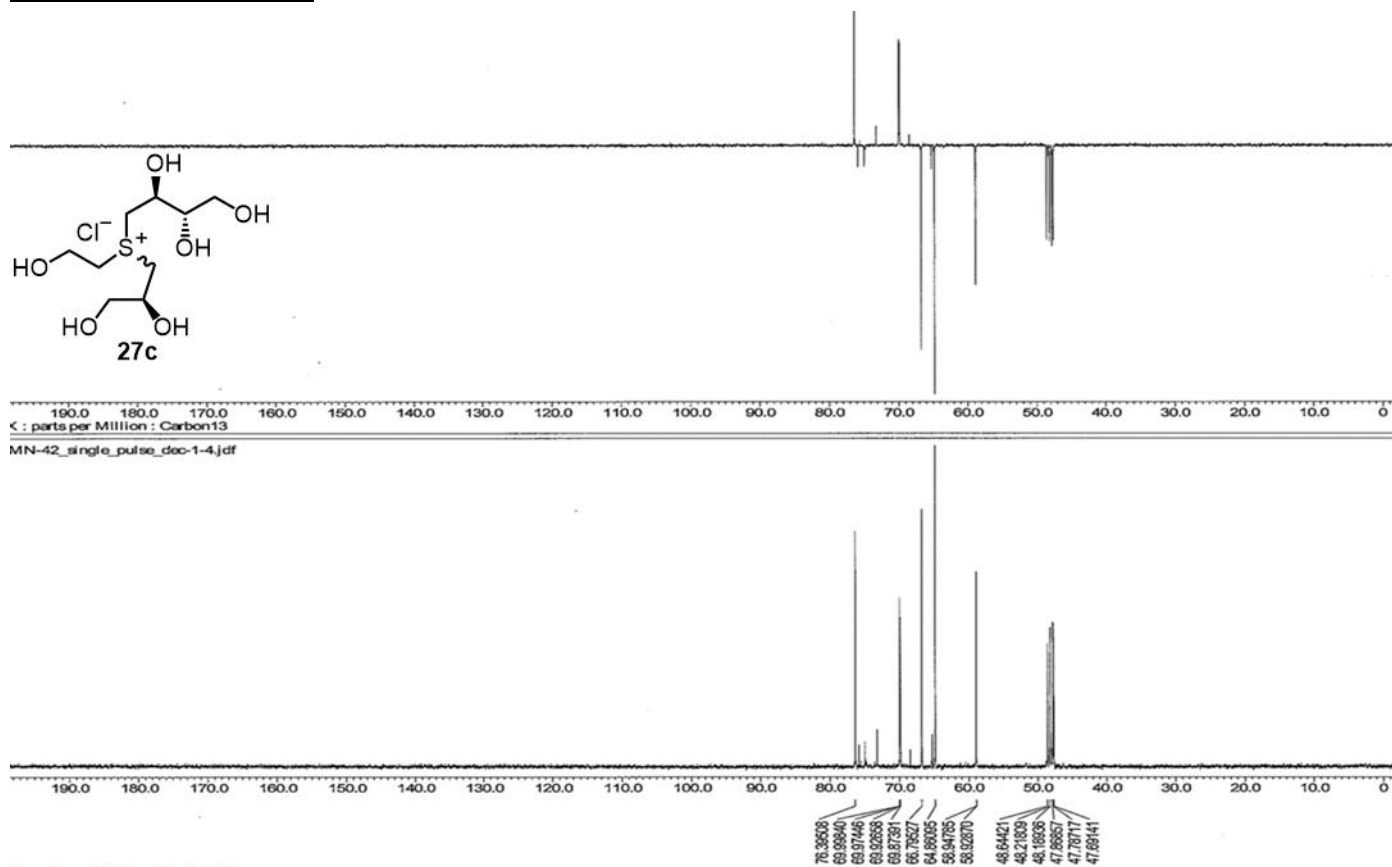

**<sup>1</sup>H NMR spectrum (800 MHz, CDCl<sub>3</sub>) of Di-*O*-benzyl-2,2'-thiodiethanol (41)**

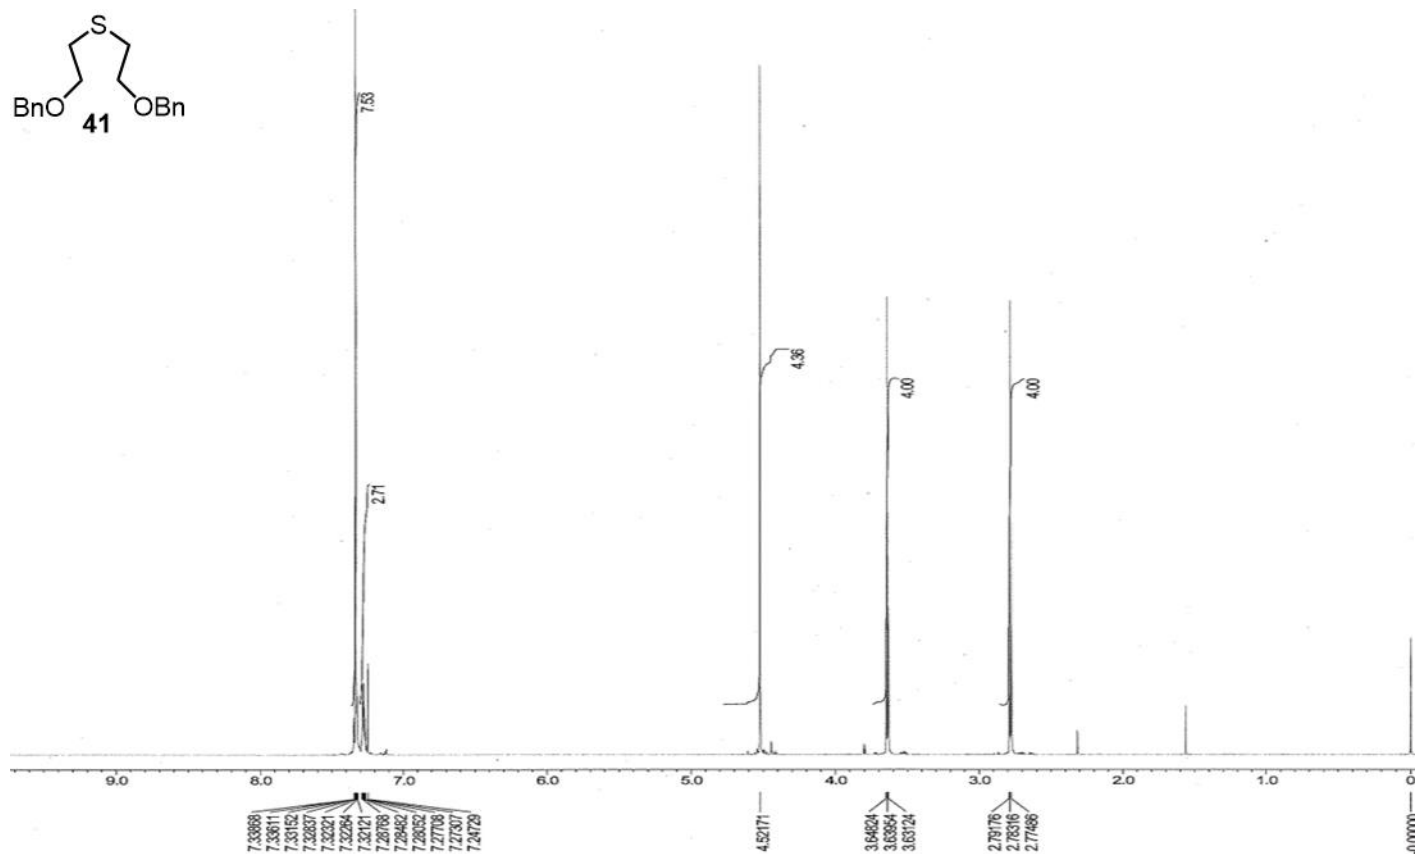

**<sup>13</sup>C NMR spectrum (200 MHz, CDCl<sub>3</sub>) of Di-*O*-benzyl-2,2'-thiodiethanol (41)**

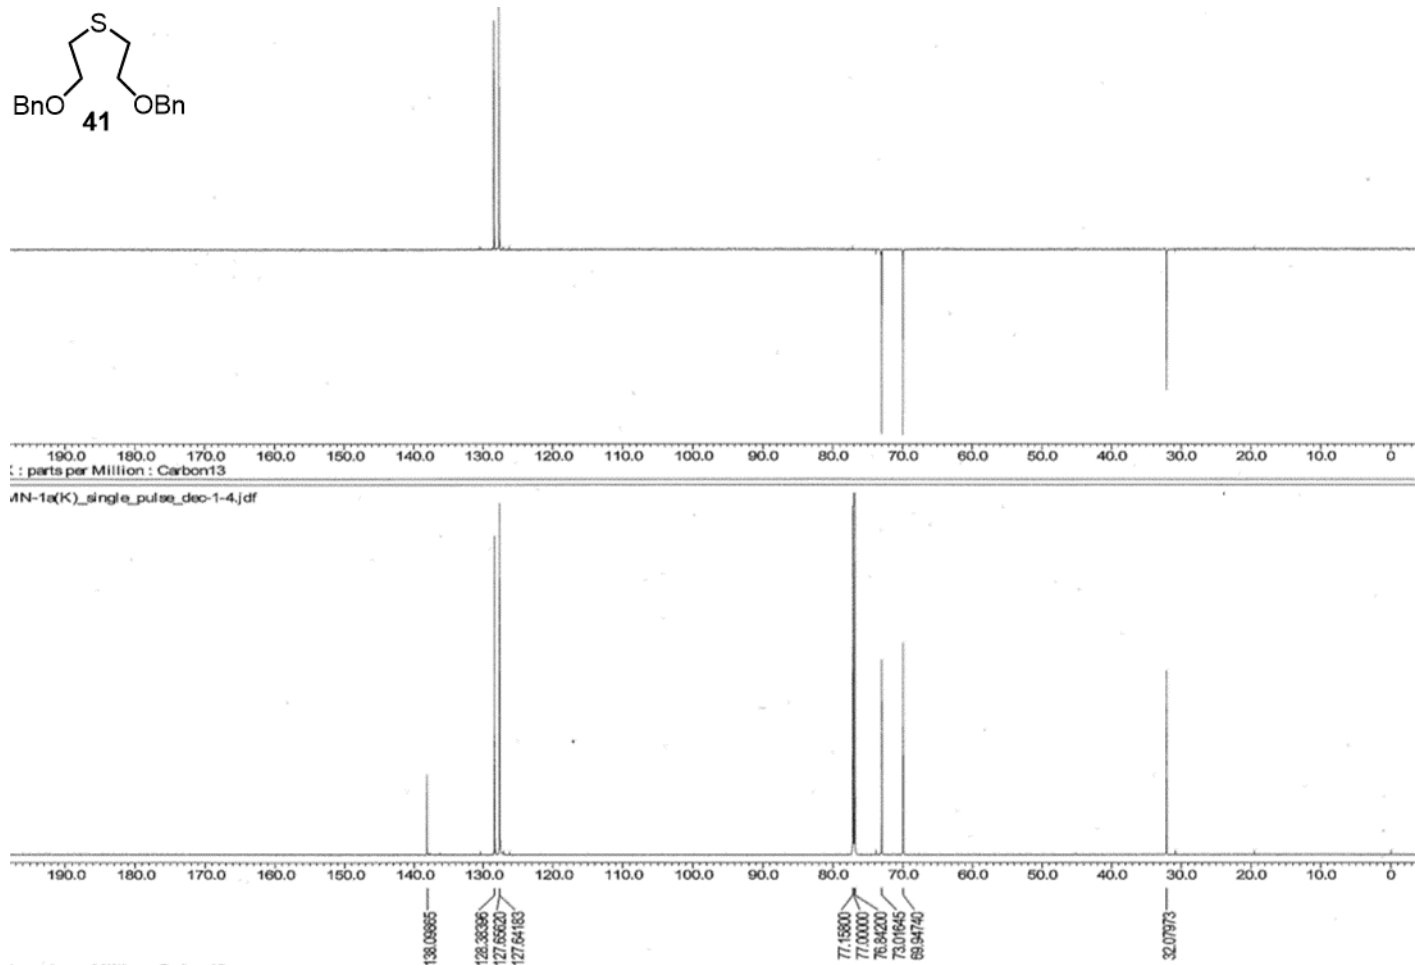

**<sup>1</sup>H NMR spectrum (800 MHz, CDCl<sub>3</sub>) of Di(2-benzyloxyethyl) [(4*S*,5*S*)-2,2-Dimethyl -5-sulfoxy-1,3-dioxan-4-ylmethyl] Sulfonium Inner Salt (42)**

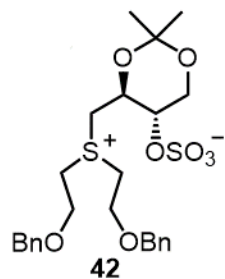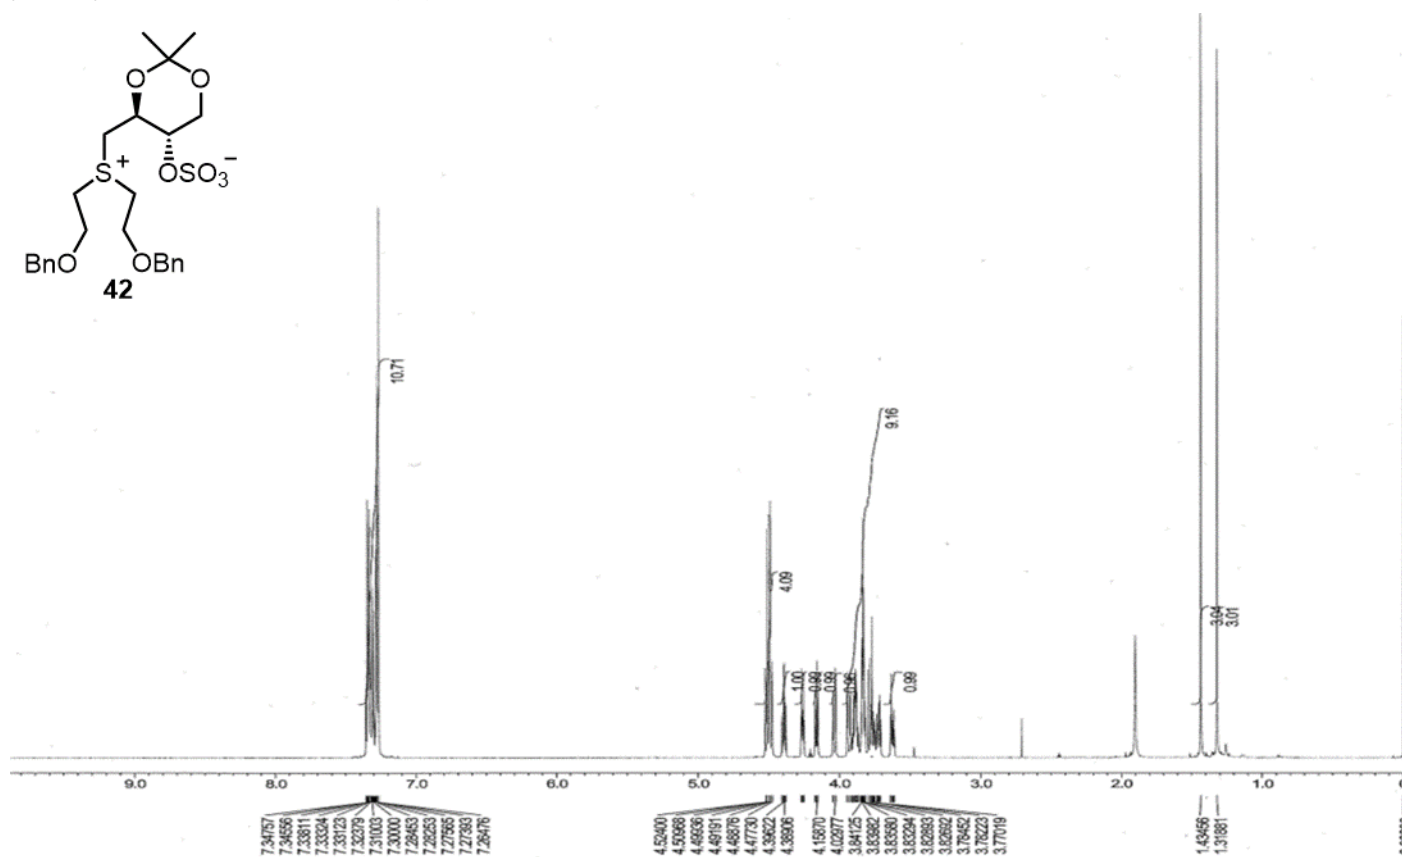

**<sup>13</sup>C NMR spectrum (200 MHz, CDCl<sub>3</sub>) of Di(2-benzyloxyethyl) [(4*S*,5*S*)-2,2-Dimethyl -5-sulfoxy-1,3-dioxan-4-ylmethyl] Sulfonium Inner Salt (42)**

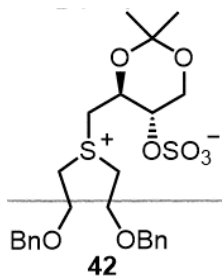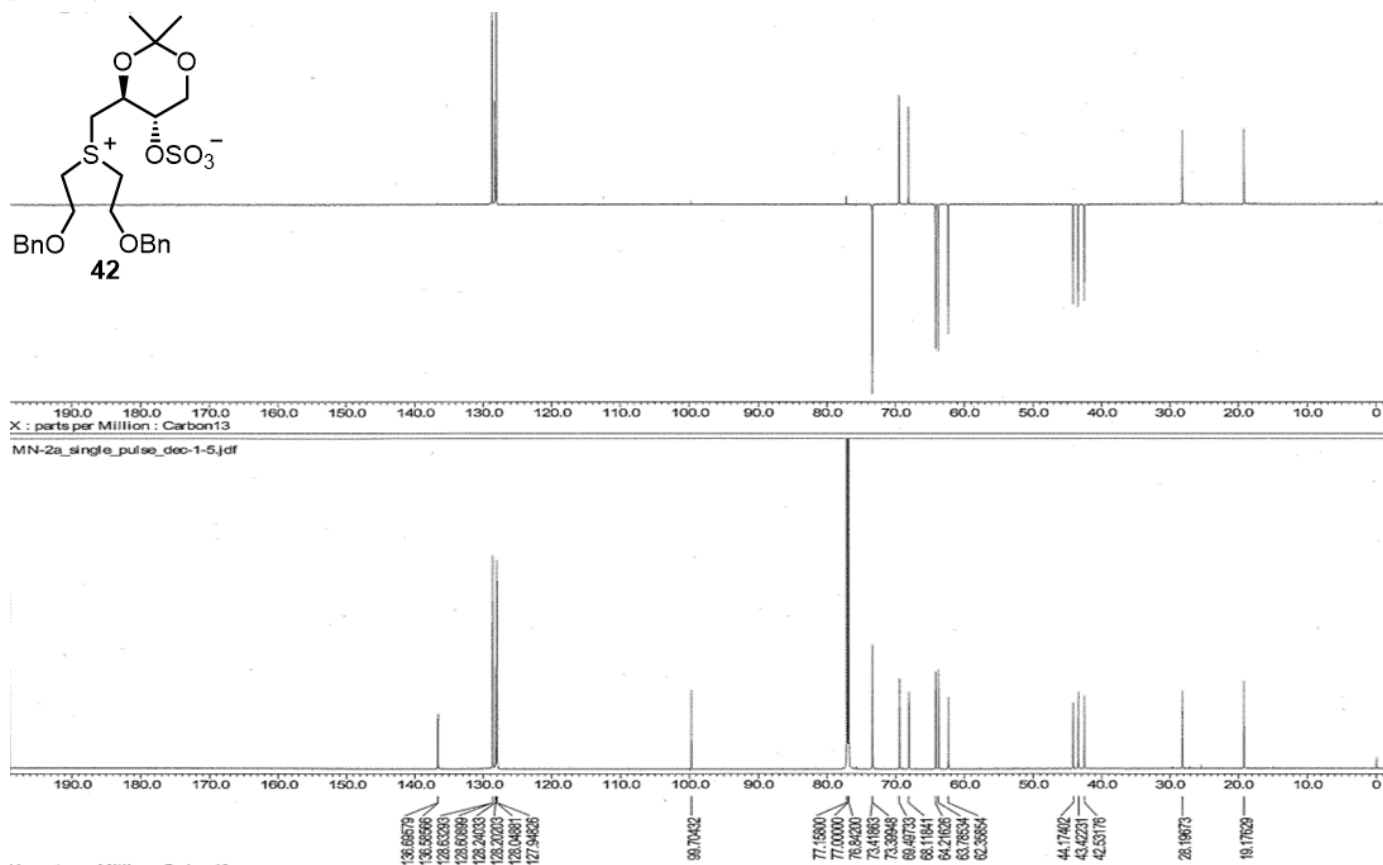

**<sup>1</sup>H NMR spectrum (800 MHz, D<sub>2</sub>O) of [(2*S*,3*S*)-2,4-Dihydroxy-3-sulfoxybutyl] Di(2-hydroxyethyl) Sulfonium Inner**

**Salt(28a)**

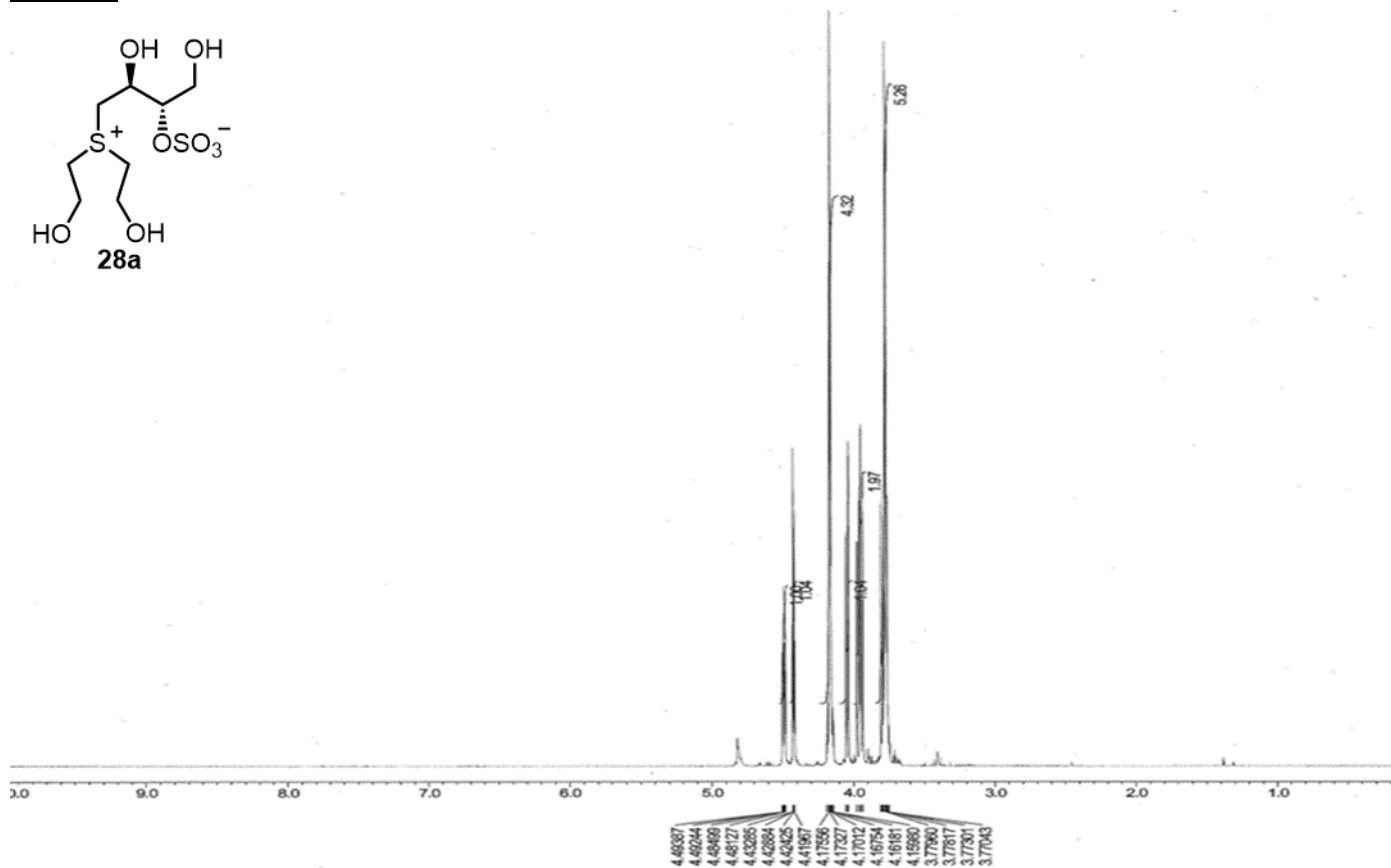

**<sup>13</sup>C NMR spectrum (200 MHz, D<sub>2</sub>O) of [(2*S*,3*S*)-2,4-Dihydroxy-3-sulfoxybutyl] Di(2-hydroxyethyl) Sulfonium Inner**

**Salt(28a)**

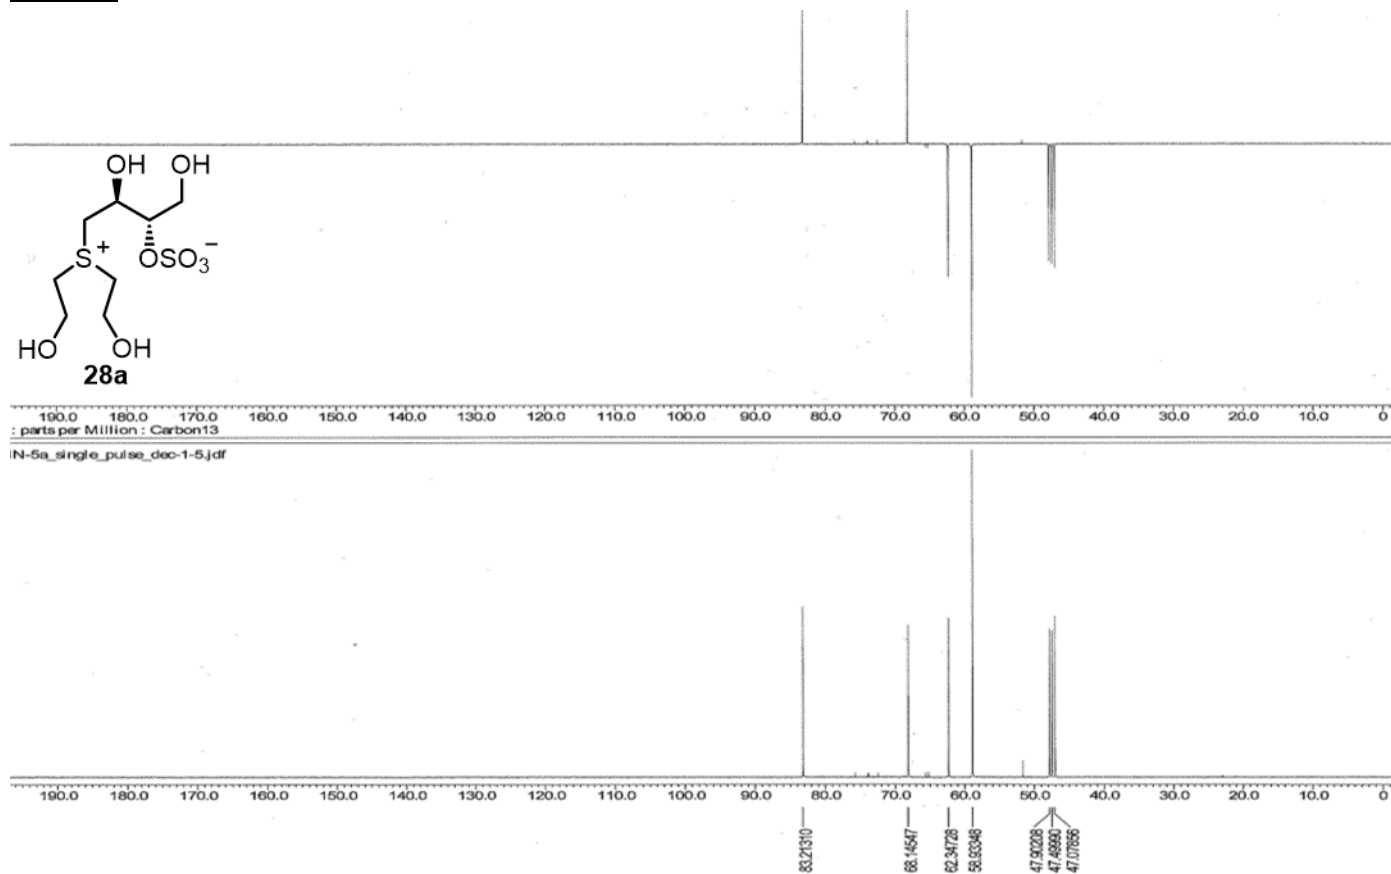

**<sup>1</sup>H NMR spectrum (800 MHz, CD<sub>3</sub>OD) of Di(2-hydroxyethyl) [(2*S*,3*S*)-2,3,4-Trihydroxybutyl] Sulfonium Methyl Sulfate (28b)**

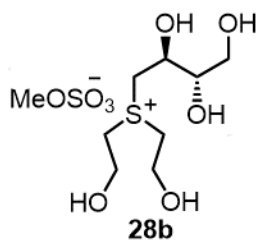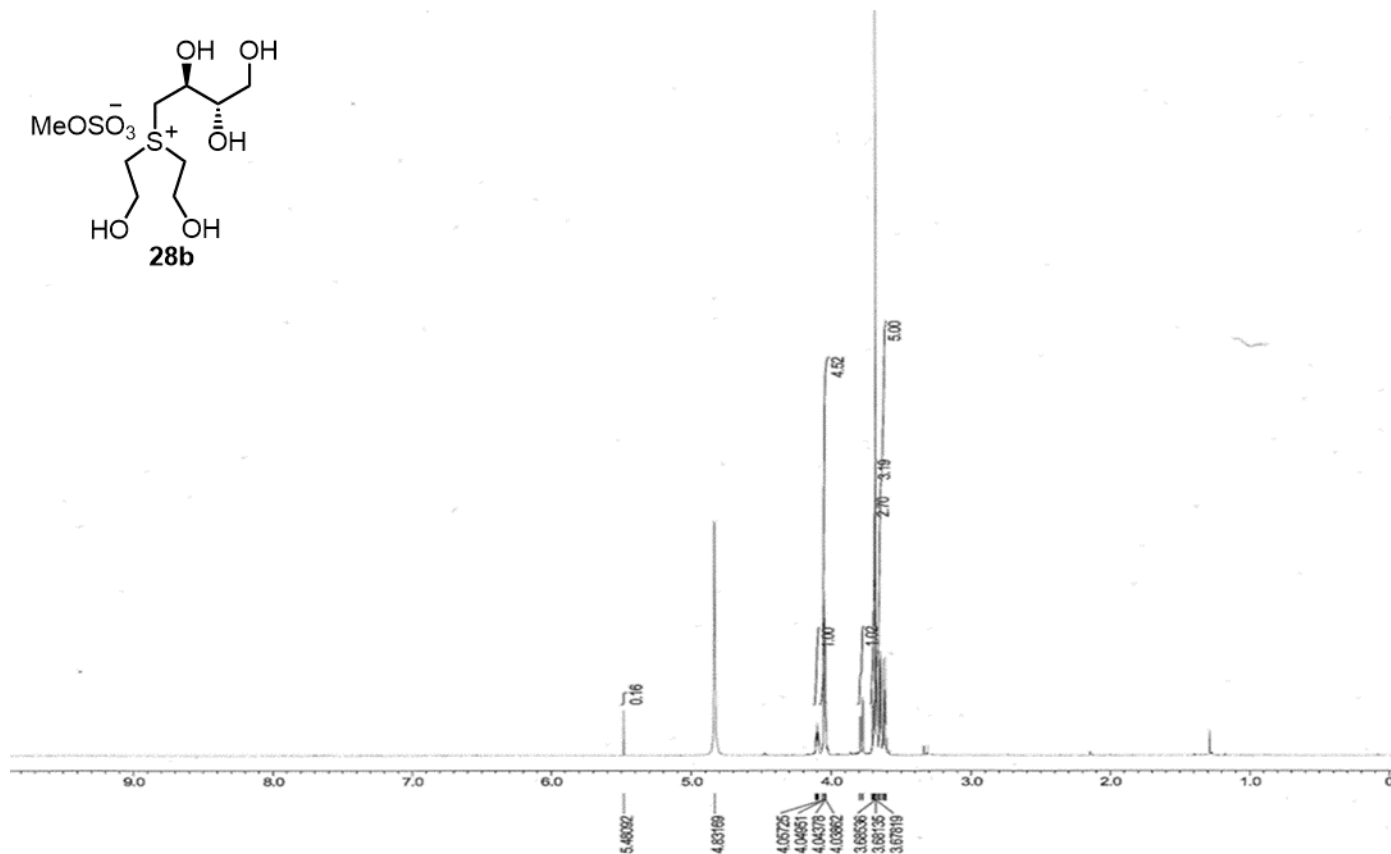

**<sup>13</sup>C NMR spectrum (200 MHz, CD<sub>3</sub>OD) of Di(2-hydroxyethyl) [(2*S*,3*S*)-2,3,4-Trihydroxybutyl] Sulfonium Methyl Sulfate (28b)**

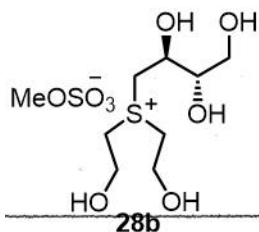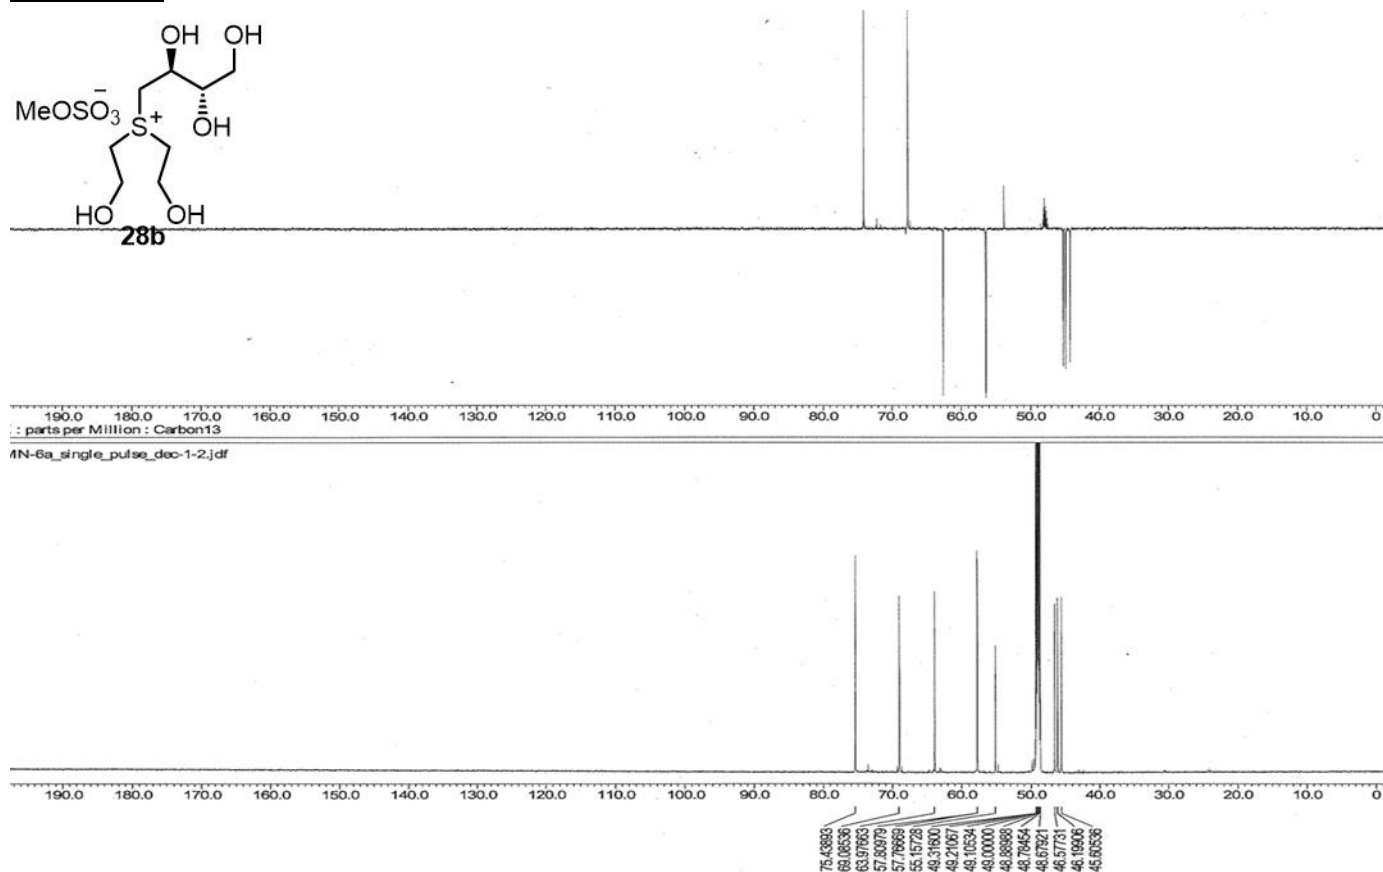



**<sup>1</sup>H NMR spectrum (800 MHz, CD<sub>3</sub>OD) of Di(2-hydroxyethyl) [(2*S*,3*S*)-2,3,4-Trihydroxybutyl] Sulfonium Chloride (28c)**

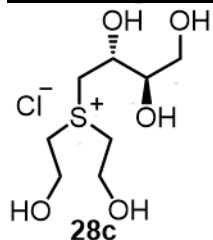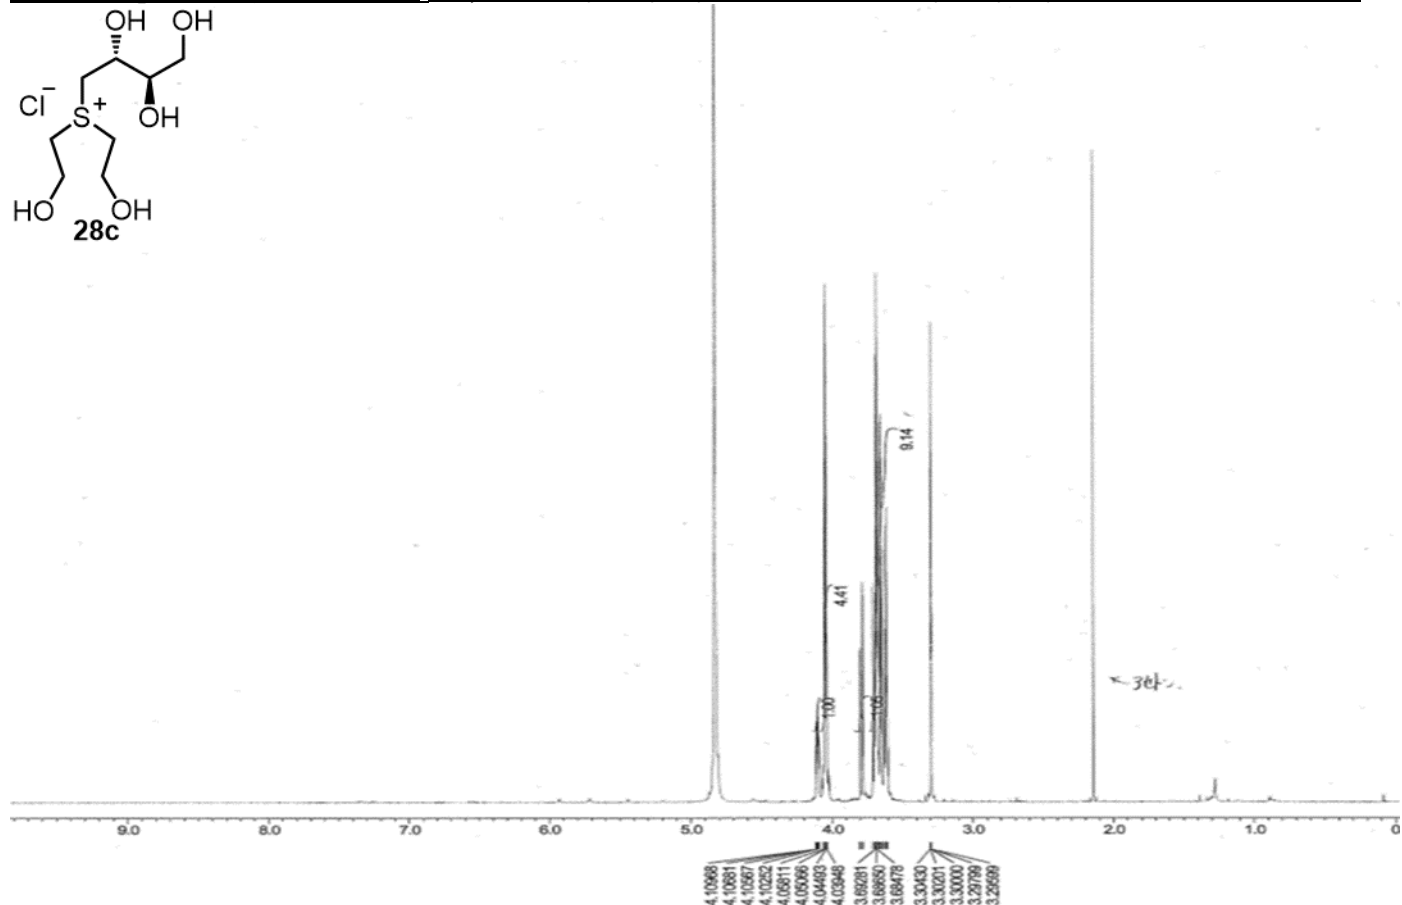

**<sup>13</sup>C NMR spectrum (200 MHz, CD<sub>3</sub>OD) of Di(2-hydroxyethyl) [(2*S*,3*S*)-2,3,4-Trihydroxybutyl] Sulfonium Chloride (28c)**

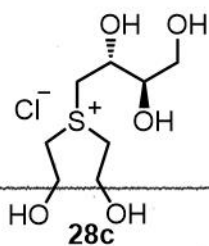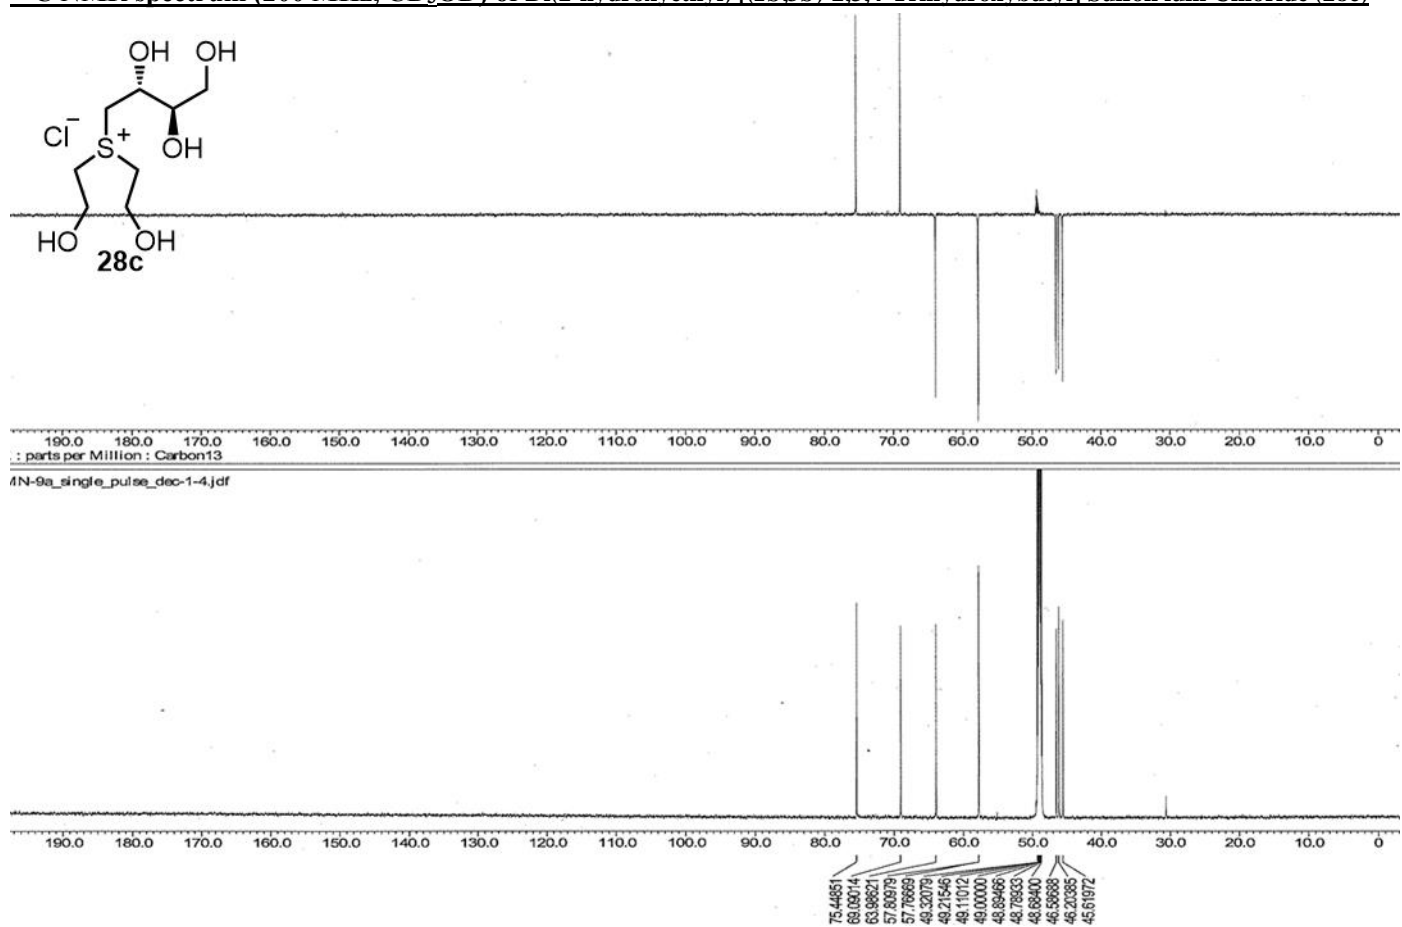

Supplement: RA-014-D3RA08485J-s001.pdf [file RA-014-D3RA08485J-s001.pdf]
